# Supplementary material for: Temporale Datenintegration in Data-Warehouse-Systemen.
Source: Royal Society of Chemistry journal article supplement (doi:10.1039/d2ra05506f), 2005-01-01
Supplement: d2ra05506f1.pdf [file d2ra05506f1.pdf]

## DFT calculation results

### 1. Results of DOS and PDOS

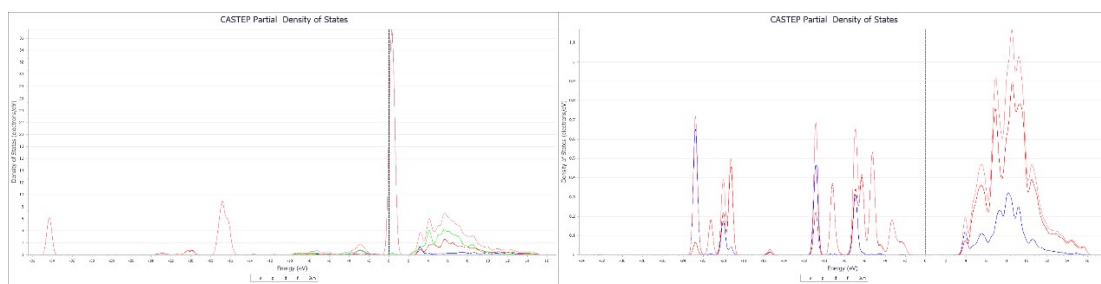

A. Ce-TDA HPO<sub>4</sub> (Ce) PDOS

b. Ce-TDA HPO<sub>4</sub> PDOS (P)

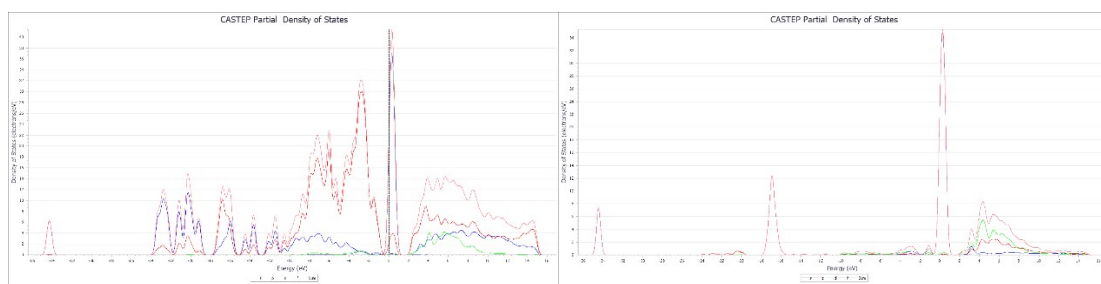

c. Ce-TDA HPO<sub>4</sub> PDOS

d. Ce-TDA PDOS (Ce)

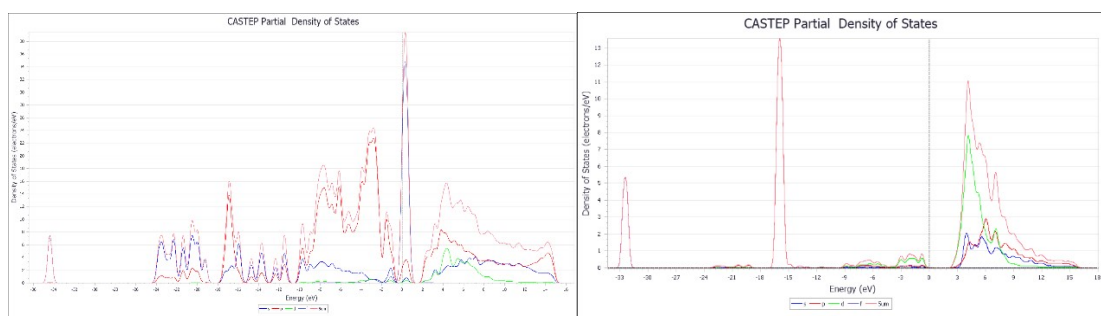

e. Ce-TDA PDOS

f. La-TDA PDOS (La)

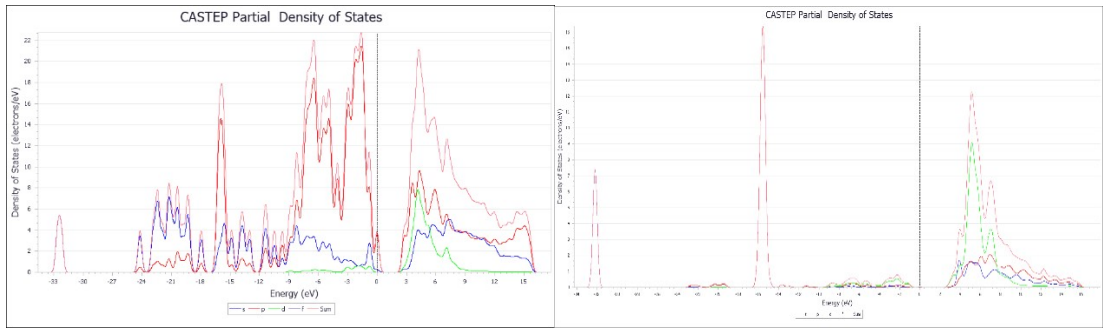

g. La-TDA PDOS

h. La-TDA-HPO<sub>4</sub> PDOS (La)

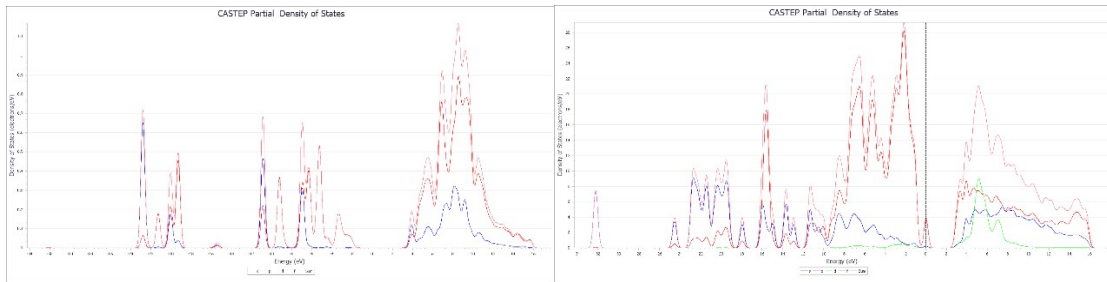

i. La-TDA-HPO<sub>4</sub> PDOS (P)

j. La-TDA-HPO<sub>4</sub> PDOS

Fig. 1 Results of DOS and PDOS

## 2. Optimized structure and results of phosphate ions

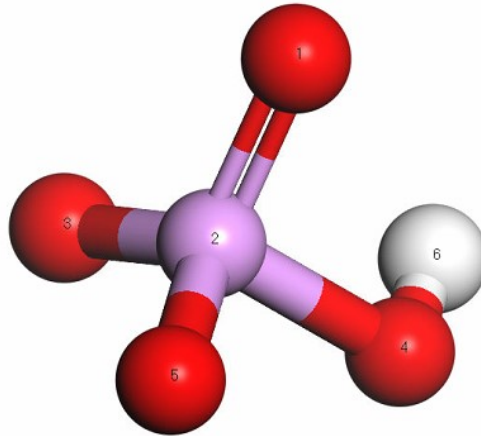

Charge partitioning by Hirshfeld method: ( -1.99995)

|   |          |         |
|---|----------|---------|
| O | 1 charge | -0.6409 |
| P | 2 charge | 0.2677  |
| O | 3 charge | -0.6410 |
| O | 4 charge | -0.4278 |

|   |          |         |
|---|----------|---------|
| O | 5 charge | -0.6291 |
| H | 6 charge | 0.0713  |

### Mulliken Population analysis

#### Population analysis for representation 1 a

|             | spin up | down   | charge | spin  |
|-------------|---------|--------|--------|-------|
| O ( 1) 10 0 | 1.000   | 1.000  | 2.001  | 0.000 |
| O ( 1) 20 0 | 0.925   | 0.925  | 1.851  | 0.000 |
| O ( 1) 20 0 | -0.004  | -0.004 | -0.008 | 0.000 |
| O ( 1) 21-1 | 0.763   | 0.763  | 1.527  | 0.000 |
| O ( 1) 21-1 | -0.000  | -0.000 | -0.000 | 0.000 |
| O ( 1) 21 0 | 0.883   | 0.883  | 1.766  | 0.000 |
| O ( 1) 21 0 | 0.003   | 0.003  | 0.005  | 0.000 |
| O ( 1) 21 1 | 0.892   | 0.892  | 1.785  | 0.000 |
| O ( 1) 21 1 | 0.004   | 0.004  | 0.007  | 0.000 |
| O ( 1) 32-2 | 0.003   | 0.003  | 0.006  | 0.000 |
| O ( 1) 32-1 | 0.003   | 0.003  | 0.007  | 0.000 |
| O ( 1) 32 0 | 0.002   | 0.002  | 0.003  | 0.000 |
| O ( 1) 32 1 | 0.001   | 0.001  | 0.001  | 0.000 |
| O ( 1) 32 2 | 0.003   | 0.003  | 0.007  | 0.000 |

|             |        |        |        |       |
|-------------|--------|--------|--------|-------|
| P ( 2) 10 0 | 1.000  | 1.000  | 2.000  | 0.000 |
| P ( 2) 20 0 | 0.998  | 0.998  | 1.996  | 0.000 |
| P ( 2) 30 0 | 0.367  | 0.367  | 0.734  | 0.000 |
| P ( 2) 30 0 | 0.039  | 0.039  | 0.078  | 0.000 |
| P ( 2) 21-1 | 0.999  | 0.999  | 1.998  | 0.000 |
| P ( 2) 31-1 | 0.277  | 0.277  | 0.553  | 0.000 |
| P ( 2) 31-1 | 0.070  | 0.070  | 0.139  | 0.000 |
| P ( 2) 21 0 | 0.999  | 0.999  | 1.999  | 0.000 |
| P ( 2) 31 0 | 0.280  | 0.280  | 0.560  | 0.000 |
| P ( 2) 31 0 | 0.062  | 0.062  | 0.124  | 0.000 |
| P ( 2) 21 1 | 1.000  | 1.000  | 1.999  | 0.000 |
| P ( 2) 31 1 | 0.292  | 0.292  | 0.585  | 0.000 |
| P ( 2) 31 1 | 0.029  | 0.029  | 0.057  | 0.000 |
| P ( 2) 32-2 | 0.062  | 0.062  | 0.124  | 0.000 |
| P ( 2) 32-1 | 0.091  | 0.091  | 0.181  | 0.000 |
| P ( 2) 32 0 | 0.077  | 0.077  | 0.155  | 0.000 |
| P ( 2) 32 1 | 0.070  | 0.070  | 0.140  | 0.000 |
| P ( 2) 32 2 | 0.078  | 0.078  | 0.155  | 0.000 |
| O ( 3) 10 0 | 1.000  | 1.000  | 2.001  | 0.000 |
| O ( 3) 20 0 | 0.926  | 0.926  | 1.851  | 0.000 |
| O ( 3) 20 0 | -0.004 | -0.004 | -0.008 | 0.000 |
| O ( 3) 21-1 | 0.908  | 0.908  | 1.815  | 0.000 |
| O ( 3) 21-1 | 0.003  | 0.003  | 0.006  | 0.000 |
| O ( 3) 21 0 | 0.790  | 0.790  | 1.580  | 0.000 |
| O ( 3) 21 0 | 0.000  | 0.000  | 0.001  | 0.000 |

|             |        |        |        |       |
|-------------|--------|--------|--------|-------|
| O ( 3) 21 1 | 0.839  | 0.839  | 1.677  | 0.000 |
| O ( 3) 21 1 | 0.003  | 0.003  | 0.005  | 0.000 |
| O ( 3) 32-2 | 0.001  | 0.001  | 0.002  | 0.000 |
| O ( 3) 32-1 | 0.002  | 0.002  | 0.004  | 0.000 |
| O ( 3) 32 0 | 0.003  | 0.003  | 0.007  | 0.000 |
| O ( 3) 32 1 | 0.004  | 0.004  | 0.008  | 0.000 |
| O ( 3) 32 2 | 0.001  | 0.001  | 0.003  | 0.000 |
| O ( 4) 10 0 | 1.000  | 1.000  | 2.000  | 0.000 |
| O ( 4) 20 0 | 0.909  | 0.909  | 1.817  | 0.000 |
| O ( 4) 20 0 | -0.014 | -0.014 | -0.028 | 0.000 |
| O ( 4) 21-1 | 0.803  | 0.803  | 1.606  | 0.000 |
| O ( 4) 21-1 | -0.003 | -0.003 | -0.006 | 0.000 |
| O ( 4) 21 0 | 0.842  | 0.842  | 1.684  | 0.000 |
| O ( 4) 21 0 | -0.001 | -0.001 | -0.002 | 0.000 |
| O ( 4) 21 1 | 0.829  | 0.829  | 1.659  | 0.000 |
| O ( 4) 21 1 | -0.001 | -0.001 | -0.002 | 0.000 |
| O ( 4) 32-2 | 0.002  | 0.002  | 0.004  | 0.000 |
| O ( 4) 32-1 | 0.004  | 0.004  | 0.009  | 0.000 |
| O ( 4) 32 0 | 0.001  | 0.001  | 0.002  | 0.000 |
| O ( 4) 32 1 | 0.001  | 0.001  | 0.002  | 0.000 |
| O ( 4) 32 2 | 0.004  | 0.004  | 0.008  | 0.000 |
| O ( 5) 10 0 | 1.000  | 1.000  | 2.001  | 0.000 |
| O ( 5) 20 0 | 0.924  | 0.924  | 1.848  | 0.000 |
| O ( 5) 20 0 | -0.004 | -0.004 | -0.007 | 0.000 |
| O ( 5) 21-1 | 0.813  | 0.813  | 1.626  | 0.000 |

|             |       |       |       |       |
|-------------|-------|-------|-------|-------|
| O ( 5) 21-1 | 0.001 | 0.001 | 0.002 | 0.000 |
| O ( 5) 21 0 | 0.828 | 0.828 | 1.655 | 0.000 |
| O ( 5) 21 0 | 0.001 | 0.001 | 0.003 | 0.000 |
| O ( 5) 21 1 | 0.890 | 0.890 | 1.781 | 0.000 |
| O ( 5) 21 1 | 0.003 | 0.003 | 0.006 | 0.000 |
| O ( 5) 32-2 | 0.002 | 0.002 | 0.004 | 0.000 |
| O ( 5) 32-1 | 0.004 | 0.004 | 0.008 | 0.000 |
| O ( 5) 32 0 | 0.003 | 0.003 | 0.005 | 0.000 |
| O ( 5) 32 1 | 0.002 | 0.002 | 0.003 | 0.000 |
| O ( 5) 32 2 | 0.002 | 0.002 | 0.004 | 0.000 |
| H ( 6) 10 0 | 0.327 | 0.327 | 0.655 | 0.000 |
| H ( 6) 10 0 | 0.049 | 0.049 | 0.097 | 0.000 |
| H ( 6) 21-1 | 0.013 | 0.013 | 0.027 | 0.000 |
| H ( 6) 21 0 | 0.012 | 0.012 | 0.024 | 0.000 |
| H ( 6) 21 1 | 0.009 | 0.009 | 0.018 | 0.000 |

#### Summarized population analysis

|           | spin up | down  | charge | spin  |
|-----------|---------|-------|--------|-------|
| O ( 1) 10 | 1.000   | 1.000 | 2.001  | 0.000 |
| O ( 1) 20 | 0.922   | 0.922 | 1.843  | 0.000 |
| O ( 1) 21 | 2.545   | 2.545 | 5.090  | 0.000 |
| O ( 1) 32 | 0.012   | 0.012 | 0.023  | 0.000 |
| O ( 3) 10 | 1.000   | 1.000 | 2.001  | 0.000 |
| O ( 3) 20 | 0.921   | 0.921 | 1.843  | 0.000 |

|           |       |       |       |       |
|-----------|-------|-------|-------|-------|
| O ( 3) 21 | 2.542 | 2.542 | 5.084 | 0.000 |
| O ( 3) 32 | 0.012 | 0.012 | 0.023 | 0.000 |
| O ( 4) 10 | 1.000 | 1.000 | 2.000 | 0.000 |
| O ( 4) 20 | 0.894 | 0.894 | 1.789 | 0.000 |
| O ( 4) 21 | 2.469 | 2.469 | 4.937 | 0.000 |
| O ( 4) 32 | 0.013 | 0.013 | 0.025 | 0.000 |
| O ( 5) 10 | 1.000 | 1.000 | 2.001 | 0.000 |
| O ( 5) 20 | 0.920 | 0.920 | 1.840 | 0.000 |
| O ( 5) 21 | 2.537 | 2.537 | 5.074 | 0.000 |
| O ( 5) 32 | 0.012 | 0.012 | 0.024 | 0.000 |
| P ( 2) 10 | 1.000 | 1.000 | 2.000 | 0.000 |
| P ( 2) 20 | 0.998 | 0.998 | 1.996 | 0.000 |
| P ( 2) 30 | 0.406 | 0.406 | 0.813 | 0.000 |
| P ( 2) 21 | 2.998 | 2.998 | 5.996 | 0.000 |
| P ( 2) 31 | 1.010 | 1.010 | 2.019 | 0.000 |
| P ( 2) 32 | 0.378 | 0.378 | 0.756 | 0.000 |
| H ( 6) 10 | 0.376 | 0.376 | 0.752 | 0.000 |
| H ( 6) 21 | 0.034 | 0.034 | 0.069 | 0.000 |

Mulliken atomic charges:

|        | charge | spin  |
|--------|--------|-------|
| O ( 1) | -0.957 | 0.000 |
| P ( 2) | 1.420  | 0.000 |
| O ( 3) | -0.951 | 0.000 |
| O ( 4) | -0.752 | 0.000 |

O ( 5) -0.939 0.000

H ( 6) 0.179 0.000

#### Mulliken bond orders

O 1 P 2 1.1020

O 1 O 3 -0.1423

P 2 O 3 1.1053

O 1 O 4 -0.1450

P 2 O 4 0.4481

O 3 O 4 -0.1346

O 1 O 5 -0.1267

P 2 O 5 1.1122

O 3 O 5 -0.1296

O 4 O 5 -0.1177

O 4 H 6 0.6186

#### Mayer bond orders

O 1 P 2 1.4997

P 2 O 3 1.5101

P 2 O 4 0.6770

P 2 O 5 1.5291

O 4 H 6 0.9918

#### Mayer total valence

O 1 1.5450



|   |   |        |
|---|---|--------|
| P | 2 | 5.2313 |
| O | 3 | 1.5486 |
| O | 4 | 1.6668 |
| O | 5 | 1.5652 |
| H | 6 | 1.0705 |

### 3. 2D La-TDA nanosheet

Surface optimization

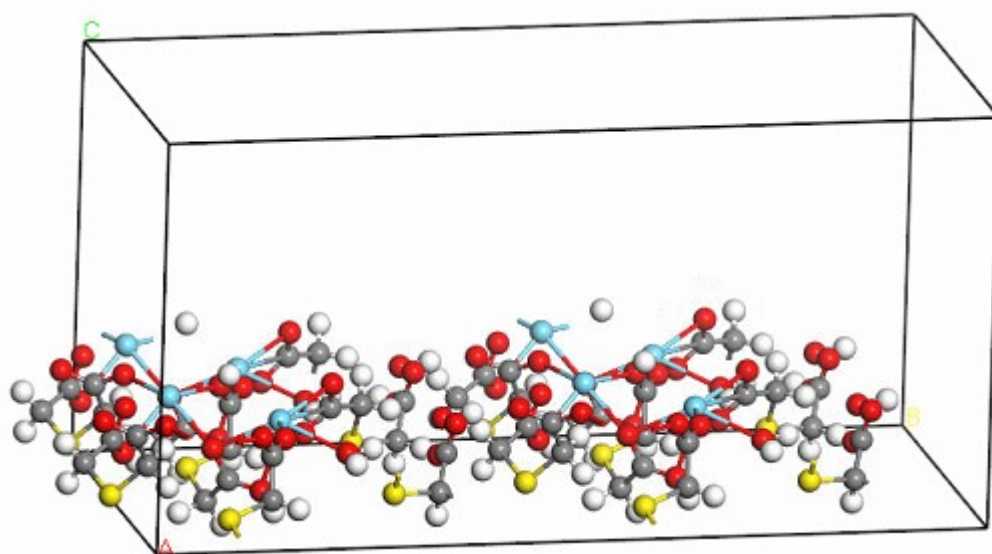

Orbital Populations

| Ion   | Atom | Orbital | Charge |
|-------|------|---------|--------|
| ----- |      |         |        |
| H     | 1    | S       | 0.493  |
| H     | 2    | S       | 0.689  |
| H     | 3    | S       | 0.663  |
| H     | 4    | S       | 0.681  |
| H     | 5    | S       | 0.680  |
| H     | 6    | S       | 0.709  |
| H     | 7    | S       | 0.713  |

|   |    |    |       |
|---|----|----|-------|
| H | 8  | S  | 0.784 |
| H | 9  | S  | 0.753 |
| H | 10 | S  | 1.452 |
| H | 11 | S  | 0.517 |
| H | 12 | S  | 0.574 |
| H | 13 | S  | 0.684 |
| H | 14 | S  | 0.684 |
| H | 15 | S  | 0.733 |
| H | 16 | S  | 0.708 |
| C | 1  | S  | 0.916 |
| C | 1  | Px | 0.762 |
| C | 1  | Py | 0.853 |
| C | 1  | Pz | 0.804 |
| C | 2  | S  | 1.364 |
| C | 2  | Px | 1.187 |
| C | 2  | Py | 1.015 |
| C | 2  | Pz | 1.128 |
| C | 3  | S  | 1.360 |
| C | 3  | Px | 1.133 |
| C | 3  | Py | 1.108 |
| C | 3  | Pz | 1.075 |
| C | 4  | S  | 0.976 |
| C | 4  | Px | 0.835 |
| C | 4  | Py | 0.891 |
| C | 4  | Pz | 0.729 |

|   |    |    |       |
|---|----|----|-------|
| C | 5  | S  | 0.983 |
| C | 5  | Px | 0.816 |
| C | 5  | Py | 0.898 |
| C | 5  | Pz | 0.742 |
| C | 6  | S  | 1.352 |
| C | 6  | Px | 1.019 |
| C | 6  | Py | 1.095 |
| C | 6  | Pz | 1.188 |
| C | 7  | S  | 1.332 |
| C | 7  | Px | 1.155 |
| C | 7  | Py | 1.108 |
| C | 7  | Pz | 1.036 |
| C | 8  | S  | 0.939 |
| C | 8  | Px | 0.813 |
| C | 8  | Py | 0.735 |
| C | 8  | Pz | 0.858 |
| C | 9  | S  | 0.984 |
| C | 9  | Px | 0.869 |
| C | 9  | Py | 0.776 |
| C | 9  | Pz | 0.815 |
| C | 10 | S  | 1.361 |
| C | 10 | Px | 0.934 |
| C | 10 | Py | 1.265 |
| C | 10 | Pz | 1.130 |
| C | 11 | S  | 1.348 |

|   |    |    |       |
|---|----|----|-------|
| C | 11 | Px | 1.252 |
| C | 11 | Py | 1.030 |
| C | 11 | Pz | 1.045 |
| C | 12 | S  | 0.949 |
| C | 12 | Px | 0.770 |
| C | 12 | Py | 0.786 |
| C | 12 | Pz | 0.882 |
| O | 1  | S  | 1.873 |
| O | 1  | Px | 1.606 |
| O | 1  | Py | 1.647 |
| O | 1  | Pz | 1.367 |
| O | 2  | S  | 1.823 |
| O | 2  | Px | 1.271 |
| O | 2  | Py | 1.752 |
| O | 2  | Pz | 1.419 |
| O | 3  | S  | 1.830 |
| O | 3  | Px | 1.756 |
| O | 3  | Py | 1.427 |
| O | 3  | Pz | 1.513 |
| O | 4  | S  | 1.832 |
| O | 4  | Px | 1.672 |
| O | 4  | Py | 1.553 |
| O | 4  | Pz | 1.583 |
| O | 5  | S  | 1.833 |
| O | 5  | Px | 1.512 |

|   |    |    |       |
|---|----|----|-------|
| O | 5  | Py | 1.738 |
| O | 5  | Pz | 1.531 |
| O | 6  | S  | 1.832 |
| O | 6  | Px | 1.684 |
| O | 6  | Py | 1.675 |
| O | 6  | Pz | 1.446 |
| O | 7  | S  | 1.832 |
| O | 7  | Px | 1.510 |
| O | 7  | Py | 1.586 |
| O | 7  | Pz | 1.705 |
| O | 8  | S  | 1.809 |
| O | 8  | Px | 1.644 |
| O | 8  | Py | 1.463 |
| O | 8  | Pz | 1.674 |
| O | 9  | S  | 1.806 |
| O | 9  | Px | 1.516 |
| O | 9  | Py | 1.630 |
| O | 9  | Pz | 1.711 |
| O | 10 | S  | 1.818 |
| O | 10 | Px | 1.728 |
| O | 10 | Py | 1.649 |
| O | 10 | Pz | 1.440 |
| O | 11 | S  | 1.834 |
| O | 11 | Px | 1.541 |
| O | 11 | Py | 1.446 |

|   |    |    |       |
|---|----|----|-------|
| O | 11 | Pz | 1.743 |
| O | 12 | S  | 1.850 |
| O | 12 | Px | 1.539 |
| O | 12 | Py | 1.578 |
| O | 12 | Pz | 1.947 |
| O | 13 | S  | 1.808 |
| O | 13 | Px | 1.584 |
| O | 13 | Py | 1.541 |
| O | 13 | Pz | 1.662 |
| O | 14 | S  | 1.796 |
| O | 14 | Px | 1.466 |
| O | 14 | Py | 1.564 |
| O | 14 | Pz | 1.807 |
| S | 1  | S  | 1.803 |
| S | 1  | Px | 1.569 |
| S | 1  | Py | 1.129 |
| S | 1  | Pz | 1.350 |
| S | 2  | S  | 1.794 |
| S | 2  | Px | 1.131 |
| S | 2  | Py | 1.574 |
| S | 2  | Pz | 1.380 |
| S | 3  | S  | 1.796 |
| S | 3  | Px | 1.200 |
| S | 3  | Py | 1.197 |
| S | 3  | Pz | 1.637 |

|    |   |        |        |
|----|---|--------|--------|
| La | 1 | S      | 1.998  |
| La | 1 | Px     | 1.991  |
| La | 1 | Py     | 1.994  |
| La | 1 | Pz     | 1.996  |
| La | 1 | S      | 0.134  |
| La | 1 | Dzz    | 0.192  |
| La | 1 | Dzy    | 0.221  |
| La | 1 | Dzx    | 0.192  |
| La | 1 | Dxx-yy | 0.176  |
| La | 1 | Dxy    | 0.300  |
| La | 1 | Px     | -0.007 |
| La | 1 | Py     | -0.015 |
| La | 1 | Pz     | -0.018 |
| La | 1 | S      | -0.060 |
| La | 2 | S      | 1.999  |
| La | 2 | Px     | 1.991  |
| La | 2 | Py     | 1.994  |
| La | 2 | Pz     | 1.996  |
| La | 2 | S      | 0.142  |
| La | 2 | Dzz    | 0.159  |
| La | 2 | Dzy    | 0.268  |
| La | 2 | Dzx    | 0.187  |
| La | 2 | Dxx-yy | 0.162  |
| La | 2 | Dxy    | 0.230  |
| La | 2 | Px     | -0.031 |

|    |   |    |        |
|----|---|----|--------|
| La | 2 | Py | -0.033 |
| La | 2 | Pz | 0.020  |
| La | 2 | S  | -0.060 |

-----

Total: 188.000

-----

### Atomic Populations (Mulliken)

-----

| Species | Ion | s    | p    | d    | f    | Total | Charge (e) |
|---------|-----|------|------|------|------|-------|------------|
| H       | 1   | 0.49 | 0.00 | 0.00 | 0.00 | 0.49  | 0.51       |
| H       | 2   | 0.69 | 0.00 | 0.00 | 0.00 | 0.69  | 0.31       |
| H       | 3   | 0.66 | 0.00 | 0.00 | 0.00 | 0.66  | 0.34       |
| H       | 4   | 0.68 | 0.00 | 0.00 | 0.00 | 0.68  | 0.32       |
| H       | 5   | 0.68 | 0.00 | 0.00 | 0.00 | 0.68  | 0.32       |
| H       | 6   | 0.71 | 0.00 | 0.00 | 0.00 | 0.71  | 0.29       |
| H       | 7   | 0.71 | 0.00 | 0.00 | 0.00 | 0.71  | 0.29       |
| H       | 8   | 0.78 | 0.00 | 0.00 | 0.00 | 0.78  | 0.22       |
| H       | 9   | 0.75 | 0.00 | 0.00 | 0.00 | 0.75  | 0.25       |
| H       | 10  | 1.45 | 0.00 | 0.00 | 0.00 | 1.45  | -0.45      |
| H       | 11  | 0.52 | 0.00 | 0.00 | 0.00 | 0.52  | 0.48       |
| H       | 12  | 0.57 | 0.00 | 0.00 | 0.00 | 0.57  | 0.43       |
| H       | 13  | 0.68 | 0.00 | 0.00 | 0.00 | 0.68  | 0.32       |
| H       | 14  | 0.68 | 0.00 | 0.00 | 0.00 | 0.68  | 0.32       |



|   |    |      |      |      |      |      |       |
|---|----|------|------|------|------|------|-------|
| H | 15 | 0.73 | 0.00 | 0.00 | 0.00 | 0.73 | 0.27  |
| H | 16 | 0.71 | 0.00 | 0.00 | 0.00 | 0.71 | 0.29  |
| C | 1  | 0.92 | 2.42 | 0.00 | 0.00 | 3.34 | 0.66  |
| C | 2  | 1.36 | 3.33 | 0.00 | 0.00 | 4.69 | -0.69 |
| C | 3  | 1.36 | 3.32 | 0.00 | 0.00 | 4.67 | -0.67 |
| C | 4  | 0.98 | 2.46 | 0.00 | 0.00 | 3.43 | 0.57  |
| C | 5  | 0.98 | 2.46 | 0.00 | 0.00 | 3.44 | 0.56  |
| C | 6  | 1.35 | 3.30 | 0.00 | 0.00 | 4.65 | -0.65 |
| C | 7  | 1.33 | 3.30 | 0.00 | 0.00 | 4.63 | -0.63 |
| C | 8  | 0.94 | 2.41 | 0.00 | 0.00 | 3.35 | 0.65  |
| C | 9  | 0.98 | 2.46 | 0.00 | 0.00 | 3.44 | 0.56  |
| C | 10 | 1.36 | 3.33 | 0.00 | 0.00 | 4.69 | -0.69 |
| C | 11 | 1.35 | 3.33 | 0.00 | 0.00 | 4.67 | -0.67 |
| C | 12 | 0.95 | 2.44 | 0.00 | 0.00 | 3.39 | 0.61  |
| O | 1  | 1.87 | 4.62 | 0.00 | 0.00 | 6.49 | -0.49 |
| O | 2  | 1.82 | 4.44 | 0.00 | 0.00 | 6.26 | -0.26 |
| O | 3  | 1.83 | 4.70 | 0.00 | 0.00 | 6.53 | -0.53 |
| O | 4  | 1.83 | 4.81 | 0.00 | 0.00 | 6.64 | -0.64 |
| O | 5  | 1.83 | 4.78 | 0.00 | 0.00 | 6.61 | -0.61 |
| O | 6  | 1.83 | 4.81 | 0.00 | 0.00 | 6.64 | -0.64 |
| O | 7  | 1.83 | 4.80 | 0.00 | 0.00 | 6.63 | -0.63 |
| O | 8  | 1.81 | 4.78 | 0.00 | 0.00 | 6.59 | -0.59 |
| O | 9  | 1.81 | 4.86 | 0.00 | 0.00 | 6.66 | -0.66 |
| O | 10 | 1.82 | 4.82 | 0.00 | 0.00 | 6.64 | -0.64 |
| O | 11 | 1.83 | 4.73 | 0.00 | 0.00 | 6.56 | -0.56 |

|    |    |      |      |      |      |      |       |
|----|----|------|------|------|------|------|-------|
| O  | 12 | 1.85 | 5.06 | 0.00 | 0.00 | 6.91 | -0.91 |
| O  | 13 | 1.81 | 4.79 | 0.00 | 0.00 | 6.60 | -0.60 |
| O  | 14 | 1.80 | 4.84 | 0.00 | 0.00 | 6.63 | -0.63 |
| S  | 1  | 1.80 | 4.05 | 0.00 | 0.00 | 5.85 | 0.15  |
| S  | 2  | 1.79 | 4.09 | 0.00 | 0.00 | 5.88 | 0.12  |
| S  | 3  | 1.80 | 4.03 | 0.00 | 0.00 | 5.83 | 0.17  |
| La | 1  | 2.07 | 5.94 | 1.08 | 0.00 | 9.10 | 1.90  |
| La | 2  | 2.08 | 5.94 | 1.01 | 0.00 | 9.02 | 1.98  |

---

| Bond         | Population | Length (A) |
|--------------|------------|------------|
| H 11 -- O 12 | 0.56       | 0.99277    |
| H 12 -- O 12 | 0.53       | 1.00926    |
| H 1 -- O 1   | 0.48       | 1.03689    |
| H 15 -- C 11 | 0.87       | 1.10031    |
| H 13 -- C 10 | 0.82       | 1.10129    |
| H 7 -- C 6   | 0.82       | 1.10199    |
| H 6 -- C 6   | 0.82       | 1.10231    |
| H 5 -- C 3   | 0.82       | 1.10244    |
| H 3 -- C 2   | 0.78       | 1.10365    |
| H 8 -- C 7   | 0.87       | 1.10477    |
| H 2 -- C 2   | 0.82       | 1.10564    |
| H 4 -- C 3   | 0.80       | 1.10588    |
| H 16 -- C 11 | 0.84       | 1.10621    |

|              |       |         |
|--------------|-------|---------|
| H 9 -- C 7   | 0.86  | 1.10691 |
| H 14 -- C 10 | 0.82  | 1.10759 |
| C 1 -- O 3   | 1.12  | 1.21497 |
| C 8 -- O 8   | 1.00  | 1.24390 |
| C 9 -- O 11  | 0.97  | 1.26284 |
| C 12 -- O 13 | 0.94  | 1.26612 |
| C 12 -- O 14 | 0.89  | 1.27805 |
| C 4 -- O 5   | 0.92  | 1.27921 |
| C 5 -- O 6   | 0.90  | 1.28648 |
| C 5 -- O 7   | 0.90  | 1.28655 |
| C 4 -- O 4   | 0.89  | 1.28796 |
| C 9 -- O 10  | 0.83  | 1.30522 |
| C 8 -- O 9   | 0.80  | 1.30908 |
| C 1 -- O 2   | 0.58  | 1.37724 |
| O 1 -- O 2   | 0.21  | 1.42488 |
| C 5 -- C 6   | 0.69  | 1.49887 |
| C 3 -- C 4   | 0.67  | 1.50443 |
| C 1 -- C 2   | 0.69  | 1.50539 |
| C 9 -- C 10  | 0.69  | 1.51038 |
| C 11 -- C 12 | 0.72  | 1.52843 |
| C 7 -- C 8   | 0.70  | 1.52931 |
| H 11 -- H 12 | -0.11 | 1.57608 |
| H 1 -- O 8   | 0.12  | 1.67032 |
| H 4 -- H 5   | -0.09 | 1.76377 |
| H 8 -- H 9   | -0.08 | 1.77041 |

|              |       |         |
|--------------|-------|---------|
| H 15 -- H 16 | -0.08 | 1.79132 |
| H 13 -- H 14 | -0.08 | 1.79534 |
| H 2 -- H 3   | -0.09 | 1.79781 |
| C 7 -- S 2   | 0.54  | 1.81082 |
| H 6 -- H 7   | -0.09 | 1.81557 |
| C 10 -- S 3  | 0.52  | 1.82265 |
| C 2 -- S 1   | 0.48  | 1.82684 |
| C 3 -- S 1   | 0.50  | 1.82821 |
| C 6 -- S 2   | 0.48  | 1.83175 |
| C 11 -- S 3  | 0.51  | 1.83189 |
| H 1 -- O 2   | -0.11 | 1.91245 |
| H 16 -- C 12 | -0.11 | 2.12778 |
| H 4 -- C 4   | -0.11 | 2.13229 |
| H 9 -- C 8   | -0.14 | 2.13319 |
| H 14 -- C 9  | -0.11 | 2.13623 |
| H 2 -- C 1   | -0.14 | 2.13885 |
| H 7 -- C 5   | -0.12 | 2.14642 |
| H 5 -- C 4   | -0.12 | 2.14807 |
| H 6 -- C 5   | -0.14 | 2.15686 |
| H 8 -- C 8   | -0.12 | 2.16482 |
| H 3 -- C 1   | -0.12 | 2.17369 |
| H 13 -- C 9  | -0.13 | 2.17740 |
| H 15 -- C 12 | -0.12 | 2.18006 |
| O 10 -- O 11 | -0.20 | 2.22671 |
| O 13 -- O 14 | -0.18 | 2.24026 |

|              |       |         |
|--------------|-------|---------|
| O 4 -- O 5   | -0.20 | 2.24558 |
| O 6 -- O 7   | -0.20 | 2.24674 |
| O 8 -- O 9   | -0.19 | 2.24748 |
| H 1 -- H 6   | -0.04 | 2.26232 |
| O 2 -- O 3   | -0.17 | 2.29799 |
| H 11 -- O 2  | 0.01  | 2.30917 |
| H 16 -- O 4  | 0.00  | 2.31558 |
| C 1 -- O 1   | -0.16 | 2.31858 |
| H 8 -- S 2   | -0.14 | 2.32181 |
| H 12 -- S 1  | 0.10  | 2.32871 |
| H 7 -- S 2   | -0.12 | 2.33563 |
| H 14 -- S 3  | -0.10 | 2.33759 |
| C 2 -- O 2   | -0.21 | 2.34518 |
| O 9 -- La 1  | 0.25  | 2.34627 |
| C 7 -- O 9   | -0.22 | 2.36992 |
| H 10 -- La 2 | 0.31  | 2.37197 |
| H 3 -- S 1   | -0.10 | 2.37652 |
| O 14 -- La 2 | 0.19  | 2.38575 |
| C 6 -- O 6   | -0.20 | 2.38825 |
| H 3 -- O 2   | -0.01 | 2.39193 |
| C 11 -- O 14 | -0.21 | 2.39588 |
| C 3 -- O 5   | -0.19 | 2.39694 |
| C 3 -- O 4   | -0.21 | 2.41197 |
| C 10 -- O 10 | -0.20 | 2.41368 |
| C 11 -- O 13 | -0.20 | 2.41846 |

|              |       |         |
|--------------|-------|---------|
| C 6 -- O 7   | -0.19 | 2.41973 |
| H 15 -- S 3  | -0.13 | 2.42065 |
| H 9 -- S 2   | -0.12 | 2.42573 |
| C 10 -- O 11 | -0.18 | 2.42689 |
| C 2 -- O 3   | -0.16 | 2.43195 |
| H 2 -- S 1   | -0.12 | 2.43429 |
| H 16 -- S 3  | -0.08 | 2.43864 |
| H 9 -- O 6   | -0.01 | 2.44523 |
| H 13 -- S 3  | -0.11 | 2.44743 |
| C 7 -- O 8   | -0.19 | 2.44788 |
| H 6 -- O 1   | -0.00 | 2.44790 |
| H 4 -- S 1   | -0.11 | 2.44952 |
| H 6 -- S 2   | -0.12 | 2.44954 |
| O 13 -- La 1 | 0.19  | 2.46525 |
| H 5 -- S 1   | -0.11 | 2.46548 |
| H 1 -- C 1   | -0.06 | 2.47219 |
| O 6 -- La 1  | 0.10  | 2.49566 |
| O 4 -- La 2  | 0.12  | 2.50633 |
| H 2 -- H 7   | -0.02 | 2.50896 |
| O 7 -- La 1  | 0.12  | 2.52166 |
| H 10 -- La 1 | 0.15  | 2.52424 |
| O 5 -- La 2  | 0.09  | 2.52831 |
| H 1 -- O 3   | -0.00 | 2.53018 |
| H 15 -- O 14 | -0.02 | 2.53036 |
| H 8 -- O 9   | -0.02 | 2.53095 |

|              |       |         |
|--------------|-------|---------|
| H 5 -- O 3   | -0.01 | 2.53403 |
| O 10 -- La 1 | 0.16  | 2.53565 |
| H 7 -- O 7   | -0.02 | 2.56829 |
| O 10 -- La 2 | 0.09  | 2.57111 |
| H 6 -- O 6   | -0.02 | 2.59004 |
| H 13 -- O 11 | -0.01 | 2.59102 |
| H 10 -- O 10 | -0.04 | 2.60114 |
| O 11 -- La 2 | 0.05  | 2.60299 |
| O 1 -- O 3   | -0.02 | 2.61649 |
| O 12 -- La 2 | 0.08  | 2.64226 |
| H 8 -- S 3   | -0.02 | 2.64681 |
| H 2 -- H 4   | 0.00  | 2.66106 |
| H 9 -- C 5   | -0.03 | 2.66281 |
| H 4 -- O 5   | -0.02 | 2.68369 |
| H 11 -- O 1  | -0.01 | 2.69377 |
| O 1 -- O 8   | -0.09 | 2.70306 |
| H 5 -- O 5   | -0.01 | 2.70646 |
| H 2 -- O 3   | -0.02 | 2.71445 |
| C 4 -- S 1   | -0.16 | 2.72281 |
| H 9 -- O 9   | -0.01 | 2.74035 |
| C 5 -- S 2   | -0.12 | 2.74859 |
| H 14 -- O 10 | -0.01 | 2.74898 |
| C 1 -- S 1   | -0.13 | 2.75860 |
| H 12 -- O 14 | -0.01 | 2.77119 |
| C 9 -- S 3   | -0.13 | 2.78236 |

|              |       |         |
|--------------|-------|---------|
| H 1 -- C 8   | -0.03 | 2.78861 |
| C 12 -- S 3  | -0.14 | 2.79346 |
| H 16 -- C 10 | -0.05 | 2.79367 |
| O 4 -- S 1   | -0.02 | 2.80108 |
| H 16 -- O 13 | -0.01 | 2.82135 |
| C 2 -- C 3   | -0.12 | 2.82135 |
| O 12 -- O 14 | -0.02 | 2.83238 |
| H 13 -- H 16 | -0.00 | 2.83684 |
| H 14 -- O 7  | -0.00 | 2.84623 |
| C 4 -- La 2  | -0.35 | 2.86893 |
| C 5 -- La 1  | -0.34 | 2.86993 |
| C 6 -- C 7   | -0.12 | 2.88626 |
| C 8 -- S 2   | -0.13 | 2.90001 |
| H 4 -- C 2   | -0.03 | 2.90647 |
| H 11 -- O 5  | -0.00 | 2.90715 |
| C 10 -- C 11 | -0.11 | 2.91153 |
| C 9 -- La 2  | -0.29 | 2.91880 |
| H 5 -- C 1   | -0.02 | 2.92990 |
| H 16 -- C 9  | -0.01 | 2.93623 |
| H 16 -- O 14 | -0.00 | 2.94496 |
| O 4 -- O 11  | -0.02 | 2.94578 |
| H 11 -- C 1  | -0.02 | 2.94583 |
| H 10 -- O 13 | -0.02 | 2.95409 |
| H 6 -- O 8   | -0.00 | 2.95759 |
| H 9 -- O 10  | -0.00 | 2.95860 |



|            |       |         |
|------------|-------|---------|
| H 9 -- C 6 | -0.03 | 2.98989 |
| H 4 -- O 1 | 0.00  | 2.99529 |
| H 2 -- C 3 | -0.03 | 2.99567 |

---

#### Hirshfeld Analysis

-----

| Species | Ion | Hirshfeld Charge (e) |
|---------|-----|----------------------|
|---------|-----|----------------------|

---

|   |    |       |
|---|----|-------|
| H | 1  | 0.10  |
| H | 2  | 0.06  |
| H | 3  | 0.06  |
| H | 4  | 0.06  |
| H | 5  | 0.06  |
| H | 6  | 0.03  |
| H | 7  | 0.05  |
| H | 8  | 0.02  |
| H | 9  | 0.04  |
| H | 10 | -0.23 |
| H | 11 | 0.14  |
| H | 12 | 0.11  |
| H | 13 | 0.06  |
| H | 14 | 0.07  |
| H | 15 | 0.05  |
| H | 16 | 0.05  |

|   |    |       |
|---|----|-------|
| C | 1  | 0.16  |
| C | 2  | -0.08 |
| C | 3  | -0.08 |
| C | 4  | 0.17  |
| C | 5  | 0.17  |
| C | 6  | -0.09 |
| C | 7  | -0.09 |
| C | 8  | 0.18  |
| C | 9  | 0.19  |
| C | 10 | -0.06 |
| C | 11 | -0.07 |
| C | 12 | 0.20  |
| O | 1  | -0.14 |
| O | 2  | -0.04 |
| O | 3  | -0.21 |
| O | 4  | -0.24 |
| O | 5  | -0.25 |
| O | 6  | -0.25 |
| O | 7  | -0.26 |
| O | 8  | -0.23 |
| O | 9  | -0.28 |
| O | 10 | -0.22 |
| O | 11 | -0.22 |
| O | 12 | -0.24 |
| O | 13 | -0.23 |

|    |    |       |
|----|----|-------|
| O  | 14 | -0.24 |
| S  | 1  | 0.08  |
| S  | 2  | 0.02  |
| S  | 3  | 0.13  |
| La | 1  | 0.61  |
| La | 2  | 0.65  |

---

#### 4. 2D La-TDA nanosheet adsorption

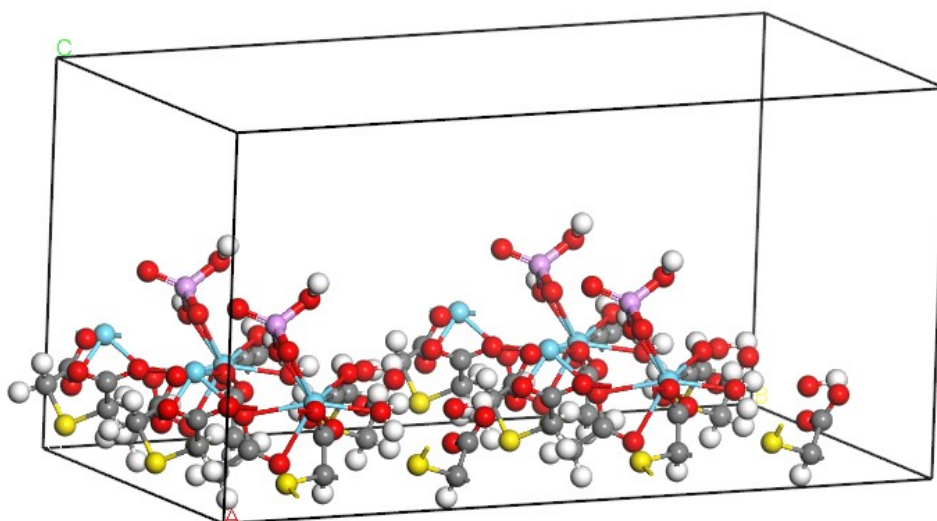

#### Orbital Populations

| Ion | Atom | Orbital | Charge |
|-----|------|---------|--------|
| H   | 1    | S       | 0.507  |
| H   | 2    | S       | 0.658  |
| H   | 3    | S       | 0.640  |
| H   | 4    | S       | 0.658  |
| H   | 5    | S       | 0.675  |

|   |    |    |       |
|---|----|----|-------|
| H | 6  | S  | 0.690 |
| H | 7  | S  | 0.671 |
| H | 8  | S  | 0.712 |
| H | 9  | S  | 0.731 |
| H | 10 | S  | 0.502 |
| H | 11 | S  | 0.501 |
| H | 12 | S  | 0.620 |
| H | 13 | S  | 0.664 |
| H | 14 | S  | 0.673 |
| H | 15 | S  | 0.690 |
| H | 16 | S  | 0.701 |
| H | 17 | S  | 0.450 |
| C | 1  | S  | 0.880 |
| C | 1  | Px | 0.754 |
| C | 1  | Py | 0.875 |
| C | 1  | Pz | 0.829 |
| C | 2  | S  | 1.365 |
| C | 2  | Px | 1.269 |
| C | 2  | Py | 0.976 |
| C | 2  | Pz | 1.143 |
| C | 3  | S  | 1.349 |
| C | 3  | Px | 1.100 |
| C | 3  | Py | 1.171 |
| C | 3  | Pz | 1.103 |
| C | 4  | S  | 0.946 |

|   |    |    |       |
|---|----|----|-------|
| C | 4  | Px | 0.873 |
| C | 4  | Py | 0.858 |
| C | 4  | Pz | 0.755 |
| C | 5  | S  | 0.960 |
| C | 5  | Px | 0.819 |
| C | 5  | Py | 0.920 |
| C | 5  | Pz | 0.735 |
| C | 6  | S  | 1.347 |
| C | 6  | Px | 1.131 |
| C | 6  | Py | 1.091 |
| C | 6  | Pz | 1.145 |
| C | 7  | S  | 1.333 |
| C | 7  | Px | 1.111 |
| C | 7  | Py | 1.142 |
| C | 7  | Pz | 1.121 |
| C | 8  | S  | 0.912 |
| C | 8  | Px | 0.840 |
| C | 8  | Py | 0.724 |
| C | 8  | Pz | 0.860 |
| C | 9  | S  | 0.949 |
| C | 9  | Px | 0.857 |
| C | 9  | Py | 0.838 |
| C | 9  | Pz | 0.794 |
| C | 10 | S  | 1.354 |
| C | 10 | Px | 0.941 |

|   |    |    |       |
|---|----|----|-------|
| C | 10 | Py | 1.252 |
| C | 10 | Pz | 1.185 |
| C | 11 | S  | 1.334 |
| C | 11 | Px | 1.265 |
| C | 11 | Py | 1.016 |
| C | 11 | Pz | 1.112 |
| C | 12 | S  | 0.921 |
| C | 12 | Px | 0.817 |
| C | 12 | Py | 0.778 |
| C | 12 | Pz | 0.866 |
| O | 1  | S  | 1.859 |
| O | 1  | Px | 1.687 |
| O | 1  | Py | 1.660 |
| O | 1  | Pz | 1.296 |
| O | 2  | S  | 1.802 |
| O | 2  | Px | 1.328 |
| O | 2  | Py | 1.717 |
| O | 2  | Pz | 1.402 |
| O | 3  | S  | 1.822 |
| O | 3  | Px | 1.729 |
| O | 3  | Py | 1.472 |
| O | 3  | Pz | 1.526 |
| O | 4  | S  | 1.819 |
| O | 4  | Px | 1.714 |
| O | 4  | Py | 1.499 |

|   |    |    |       |
|---|----|----|-------|
| O | 4  | Pz | 1.608 |
| O | 5  | S  | 1.823 |
| O | 5  | Px | 1.511 |
| O | 5  | Py | 1.742 |
| O | 5  | Pz | 1.530 |
| O | 6  | S  | 1.825 |
| O | 6  | Px | 1.661 |
| O | 6  | Py | 1.649 |
| O | 6  | Pz | 1.480 |
| O | 7  | S  | 1.821 |
| O | 7  | Px | 1.512 |
| O | 7  | Py | 1.633 |
| O | 7  | Pz | 1.665 |
| O | 8  | S  | 1.802 |
| O | 8  | Px | 1.645 |
| O | 8  | Py | 1.461 |
| O | 8  | Pz | 1.667 |
| O | 9  | S  | 1.789 |
| O | 9  | Px | 1.557 |
| O | 9  | Py | 1.611 |
| O | 9  | Pz | 1.683 |
| O | 10 | S  | 1.803 |
| O | 10 | Px | 1.717 |
| O | 10 | Py | 1.685 |
| O | 10 | Pz | 1.422 |

|   |    |    |       |
|---|----|----|-------|
| O | 11 | S  | 1.822 |
| O | 11 | Px | 1.505 |
| O | 11 | Py | 1.467 |
| O | 11 | Pz | 1.779 |
| O | 12 | S  | 1.836 |
| O | 12 | Px | 1.641 |
| O | 12 | Py | 1.604 |
| O | 12 | Pz | 1.828 |
| O | 13 | S  | 1.797 |
| O | 13 | Px | 1.653 |
| O | 13 | Py | 1.585 |
| O | 13 | Pz | 1.586 |
| O | 14 | S  | 1.789 |
| O | 14 | Px | 1.472 |
| O | 14 | Py | 1.530 |
| O | 14 | Pz | 1.831 |
| O | 15 | S  | 1.899 |
| O | 15 | Px | 1.701 |
| O | 15 | Py | 1.628 |
| O | 15 | Pz | 1.752 |
| O | 16 | S  | 1.837 |
| O | 16 | Px | 1.557 |
| O | 16 | Py | 1.832 |
| O | 16 | Pz | 1.722 |
| O | 17 | S  | 1.859 |



|    |    |    |       |
|----|----|----|-------|
| O  | 17 | Px | 1.765 |
| O  | 17 | Py | 1.699 |
| O  | 17 | Pz | 1.660 |
| O  | 18 | S  | 1.880 |
| O  | 18 | Px | 1.659 |
| O  | 18 | Py | 1.791 |
| O  | 18 | Pz | 1.666 |
| P  | 1  | S  | 0.922 |
| P  | 1  | Px | 0.608 |
| P  | 1  | Py | 0.619 |
| P  | 1  | Pz | 0.636 |
| S  | 1  | S  | 1.789 |
| S  | 1  | Px | 1.553 |
| S  | 1  | Py | 1.150 |
| S  | 1  | Pz | 1.298 |
| S  | 2  | S  | 1.780 |
| S  | 2  | Px | 1.125 |
| S  | 2  | Py | 1.584 |
| S  | 2  | Pz | 1.360 |
| S  | 3  | S  | 1.779 |
| S  | 3  | Px | 1.183 |
| S  | 3  | Py | 1.128 |
| S  | 3  | Pz | 1.699 |
| La | 1  | S  | 1.999 |
| La | 1  | Px | 1.989 |

|    |   |        |        |
|----|---|--------|--------|
| La | 1 | Py     | 1.992  |
| La | 1 | Pz     | 1.996  |
| La | 1 | S      | 0.134  |
| La | 1 | Dzz    | 0.217  |
| La | 1 | Dzy    | 0.225  |
| La | 1 | Dzx    | 0.197  |
| La | 1 | Dxx-yy | 0.177  |
| La | 1 | Dxy    | 0.273  |
| La | 1 | Px     | 0.012  |
| La | 1 | Py     | -0.039 |
| La | 1 | Pz     | -0.022 |
| La | 1 | S      | -0.066 |
| La | 2 | S      | 2.000  |
| La | 2 | Px     | 1.991  |
| La | 2 | Py     | 1.994  |
| La | 2 | Pz     | 1.996  |
| La | 2 | S      | 0.115  |
| La | 2 | Dzz    | 0.214  |
| La | 2 | Dzy    | 0.212  |
| La | 2 | Dzx    | 0.183  |
| La | 2 | Dxx-yy | 0.208  |
| La | 2 | Dxy    | 0.208  |
| La | 2 | Px     | -0.029 |
| La | 2 | Py     | -0.042 |
| La | 2 | Pz     | -0.007 |

La 2 S -0.072

-----  
Total: 218.000  
-----

Atomic Populations (Mulliken)

-----

| Species | Ion | s    | p    | d    | f    | Total | Charge (e) |
|---------|-----|------|------|------|------|-------|------------|
| H       | 1   | 0.51 | 0.00 | 0.00 | 0.00 | 0.51  | 0.49       |
| H       | 2   | 0.66 | 0.00 | 0.00 | 0.00 | 0.66  | 0.34       |
| H       | 3   | 0.64 | 0.00 | 0.00 | 0.00 | 0.64  | 0.36       |
| H       | 4   | 0.66 | 0.00 | 0.00 | 0.00 | 0.66  | 0.34       |
| H       | 5   | 0.68 | 0.00 | 0.00 | 0.00 | 0.68  | 0.32       |
| H       | 6   | 0.69 | 0.00 | 0.00 | 0.00 | 0.69  | 0.31       |
| H       | 7   | 0.67 | 0.00 | 0.00 | 0.00 | 0.67  | 0.33       |
| H       | 8   | 0.71 | 0.00 | 0.00 | 0.00 | 0.71  | 0.29       |
| H       | 9   | 0.73 | 0.00 | 0.00 | 0.00 | 0.73  | 0.27       |
| H       | 10  | 0.50 | 0.00 | 0.00 | 0.00 | 0.50  | 0.50       |
| H       | 11  | 0.50 | 0.00 | 0.00 | 0.00 | 0.50  | 0.50       |
| H       | 12  | 0.62 | 0.00 | 0.00 | 0.00 | 0.62  | 0.38       |
| H       | 13  | 0.66 | 0.00 | 0.00 | 0.00 | 0.66  | 0.34       |
| H       | 14  | 0.67 | 0.00 | 0.00 | 0.00 | 0.67  | 0.33       |
| H       | 15  | 0.69 | 0.00 | 0.00 | 0.00 | 0.69  | 0.31       |
| H       | 16  | 0.70 | 0.00 | 0.00 | 0.00 | 0.70  | 0.30       |

|   |    |      |      |      |      |      |       |
|---|----|------|------|------|------|------|-------|
| H | 17 | 0.45 | 0.00 | 0.00 | 0.00 | 0.45 | 0.55  |
| C | 1  | 0.88 | 2.46 | 0.00 | 0.00 | 3.34 | 0.66  |
| C | 2  | 1.36 | 3.39 | 0.00 | 0.00 | 4.75 | -0.75 |
| C | 3  | 1.35 | 3.37 | 0.00 | 0.00 | 4.72 | -0.72 |
| C | 4  | 0.95 | 2.49 | 0.00 | 0.00 | 3.43 | 0.57  |
| C | 5  | 0.96 | 2.47 | 0.00 | 0.00 | 3.43 | 0.57  |
| C | 6  | 1.35 | 3.37 | 0.00 | 0.00 | 4.71 | -0.71 |
| C | 7  | 1.33 | 3.37 | 0.00 | 0.00 | 4.71 | -0.71 |
| C | 8  | 0.91 | 2.42 | 0.00 | 0.00 | 3.34 | 0.66  |
| C | 9  | 0.95 | 2.49 | 0.00 | 0.00 | 3.44 | 0.56  |
| C | 10 | 1.35 | 3.38 | 0.00 | 0.00 | 4.73 | -0.73 |
| C | 11 | 1.33 | 3.39 | 0.00 | 0.00 | 4.73 | -0.73 |
| C | 12 | 0.92 | 2.46 | 0.00 | 0.00 | 3.38 | 0.62  |
| O | 1  | 1.86 | 4.64 | 0.00 | 0.00 | 6.50 | -0.50 |
| O | 2  | 1.80 | 4.45 | 0.00 | 0.00 | 6.25 | -0.25 |
| O | 3  | 1.82 | 4.73 | 0.00 | 0.00 | 6.55 | -0.55 |
| O | 4  | 1.82 | 4.82 | 0.00 | 0.00 | 6.64 | -0.64 |
| O | 5  | 1.82 | 4.78 | 0.00 | 0.00 | 6.61 | -0.61 |
| O | 6  | 1.83 | 4.79 | 0.00 | 0.00 | 6.62 | -0.62 |
| O | 7  | 1.82 | 4.81 | 0.00 | 0.00 | 6.63 | -0.63 |
| O | 8  | 1.80 | 4.77 | 0.00 | 0.00 | 6.58 | -0.58 |
| O | 9  | 1.79 | 4.85 | 0.00 | 0.00 | 6.64 | -0.64 |
| O | 10 | 1.80 | 4.82 | 0.00 | 0.00 | 6.63 | -0.63 |
| O | 11 | 1.82 | 4.75 | 0.00 | 0.00 | 6.57 | -0.57 |
| O | 12 | 1.84 | 5.07 | 0.00 | 0.00 | 6.91 | -0.91 |

|    |    |      |      |      |      |      |       |
|----|----|------|------|------|------|------|-------|
| O  | 13 | 1.80 | 4.82 | 0.00 | 0.00 | 6.62 | -0.62 |
| O  | 14 | 1.79 | 4.83 | 0.00 | 0.00 | 6.62 | -0.62 |
| O  | 15 | 1.90 | 5.08 | 0.00 | 0.00 | 6.98 | -0.98 |
| O  | 16 | 1.84 | 5.11 | 0.00 | 0.00 | 6.95 | -0.95 |
| O  | 17 | 1.86 | 5.12 | 0.00 | 0.00 | 6.98 | -0.98 |
| O  | 18 | 1.88 | 5.12 | 0.00 | 0.00 | 7.00 | -1.00 |
| P  | 1  | 0.92 | 1.86 | 0.00 | 0.00 | 2.79 | 2.21  |
| S  | 1  | 1.79 | 4.00 | 0.00 | 0.00 | 5.79 | 0.21  |
| S  | 2  | 1.78 | 4.07 | 0.00 | 0.00 | 5.85 | 0.15  |
| S  | 3  | 1.78 | 4.01 | 0.00 | 0.00 | 5.79 | 0.21  |
| La | 1  | 2.07 | 5.93 | 1.09 | 0.00 | 9.08 | 1.92  |
| La | 2  | 2.04 | 5.90 | 1.02 | 0.00 | 8.97 | 2.03  |

=====

| Bond | Population | Length (A) |
|------|------------|------------|
|------|------------|------------|

=====

|              |      |         |
|--------------|------|---------|
| H 17 -- O 17 | 0.52 | 0.99274 |
| H 11 -- O 12 | 0.55 | 1.00151 |
| H 10 -- O 16 | 0.56 | 1.00974 |
| H 12 -- O 12 | 0.51 | 1.02494 |
| H 1 -- O 1   | 0.44 | 1.06424 |
| H 15 -- C 11 | 0.84 | 1.09936 |
| H 3 -- C 2   | 0.78 | 1.10255 |
| H 13 -- C 10 | 0.82 | 1.10590 |
| H 6 -- C 6   | 0.83 | 1.10856 |

|              |      |         |
|--------------|------|---------|
| H 16 -- C 11 | 0.85 | 1.11011 |
| H 5 -- C 3   | 0.82 | 1.11042 |
| H 7 -- C 6   | 0.79 | 1.11279 |
| H 8 -- C 7   | 0.83 | 1.11426 |
| H 2 -- C 2   | 0.80 | 1.11468 |
| H 4 -- C 3   | 0.81 | 1.11469 |
| H 9 -- C 7   | 0.85 | 1.11793 |
| H 14 -- C 10 | 0.81 | 1.12064 |
| C 1 -- O 3   | 1.12 | 1.20755 |
| C 8 -- O 8   | 0.99 | 1.23861 |
| C 9 -- O 11  | 0.99 | 1.25163 |
| C 12 -- O 14 | 0.92 | 1.26304 |
| C 4 -- O 5   | 0.95 | 1.26488 |
| C 12 -- O 13 | 0.93 | 1.26857 |
| C 5 -- O 6   | 0.92 | 1.27174 |
| C 4 -- O 4   | 0.91 | 1.27731 |
| C 5 -- O 7   | 0.90 | 1.27794 |
| C 9 -- O 10  | 0.86 | 1.29297 |
| C 8 -- O 9   | 0.82 | 1.29557 |
| C 1 -- O 2   | 0.62 | 1.35146 |
| O 1 -- O 2   | 0.21 | 1.40105 |
| C 1 -- C 2   | 0.70 | 1.48976 |
| C 11 -- C 12 | 0.74 | 1.49138 |
| C 5 -- C 6   | 0.70 | 1.49499 |
| C 3 -- C 4   | 0.67 | 1.49505 |

|              |       |         |
|--------------|-------|---------|
| C 9 -- C 10  | 0.72  | 1.49721 |
| O 15 -- P 1  | 0.77  | 1.50274 |
| C 7 -- C 8   | 0.71  | 1.50733 |
| O 18 -- P 1  | 0.67  | 1.51721 |
| H 1 -- O 8   | 0.17  | 1.55278 |
| O 17 -- P 1  | 0.45  | 1.60378 |
| O 16 -- P 1  | 0.37  | 1.63189 |
| H 11 -- H 12 | -0.10 | 1.64134 |
| H 4 -- H 5   | -0.09 | 1.74697 |
| H 15 -- H 16 | -0.09 | 1.77355 |
| C 7 -- S 2   | 0.55  | 1.78608 |
| C 11 -- S 3  | 0.53  | 1.78967 |
| H 8 -- H 9   | -0.07 | 1.79260 |
| C 6 -- S 2   | 0.50  | 1.79377 |
| C 10 -- S 3  | 0.54  | 1.79751 |
| C 2 -- S 1   | 0.48  | 1.80188 |
| C 3 -- S 1   | 0.50  | 1.80530 |
| H 13 -- H 14 | -0.09 | 1.80551 |
| H 6 -- H 7   | -0.08 | 1.80755 |
| H 2 -- H 3   | -0.08 | 1.84477 |
| H 1 -- O 2   | -0.11 | 1.95029 |
| H 12 -- S 1  | 0.17  | 2.00785 |
| H 16 -- O 4  | 0.01  | 2.06893 |
| H 16 -- C 12 | -0.11 | 2.08982 |
| H 4 -- C 4   | -0.11 | 2.12271 |

|              |       |         |
|--------------|-------|---------|
| H 8 -- C 8   | -0.12 | 2.12335 |
| H 15 -- C 12 | -0.13 | 2.13478 |
| H 6 -- C 5   | -0.15 | 2.13655 |
| H 7 -- C 5   | -0.12 | 2.14548 |
| H 9 -- C 8   | -0.14 | 2.15151 |
| H 14 -- C 9  | -0.09 | 2.15414 |
| H 5 -- C 4   | -0.12 | 2.15530 |
| H 2 -- C 1   | -0.14 | 2.15950 |
| H 3 -- C 1   | -0.12 | 2.16201 |
| H 13 -- C 9  | -0.13 | 2.16263 |
| H 17 -- P 1  | -0.12 | 2.20413 |
| O 6 -- O 7   | -0.21 | 2.21465 |
| O 10 -- O 11 | -0.21 | 2.21519 |
| O 4 -- O 5   | -0.21 | 2.22262 |
| O 8 -- O 9   | -0.19 | 2.23180 |
| O 13 -- O 14 | -0.19 | 2.23189 |
| O 2 -- O 3   | -0.18 | 2.26643 |
| C 1 -- O 1   | -0.18 | 2.27474 |
| H 10 -- P 1  | -0.08 | 2.27571 |
| H 11 -- O 1  | 0.03  | 2.28102 |
| O 9 -- La 1  | 0.26  | 2.30831 |
| H 3 -- S 1   | -0.12 | 2.31564 |
| H 8 -- S 2   | -0.13 | 2.31727 |
| C 2 -- O 2   | -0.23 | 2.32569 |
| H 14 -- S 3  | -0.10 | 2.34494 |



|              |       |         |
|--------------|-------|---------|
| H 1 -- H 6   | -0.03 | 2.34522 |
| H 14 -- O 7  | 0.00  | 2.34580 |
| C 7 -- O 9   | -0.22 | 2.35039 |
| H 10 -- O 13 | 0.01  | 2.35120 |
| H 7 -- S 2   | -0.11 | 2.35555 |
| C 11 -- O 14 | -0.22 | 2.35686 |
| C 3 -- O 5   | -0.21 | 2.35756 |
| O 14 -- La 2 | 0.17  | 2.37254 |
| C 11 -- O 13 | -0.22 | 2.37949 |
| C 6 -- O 6   | -0.20 | 2.38851 |
| C 10 -- O 11 | -0.19 | 2.39286 |
| C 10 -- O 10 | -0.20 | 2.39632 |
| H 1 -- O 3   | -0.00 | 2.39633 |
| H 3 -- O 2   | -0.01 | 2.39719 |
| O 18 -- La 2 | 0.18  | 2.40027 |
| C 2 -- O 3   | -0.17 | 2.40077 |
| C 6 -- O 7   | -0.20 | 2.40595 |
| O 16 -- O 18 | -0.14 | 2.41058 |
| C 7 -- O 8   | -0.21 | 2.41327 |
| O 16 -- O 17 | -0.13 | 2.41504 |
| C 3 -- O 4   | -0.20 | 2.41505 |
| H 6 -- S 2   | -0.13 | 2.41632 |
| H 2 -- S 1   | -0.12 | 2.41653 |
| H 15 -- S 3  | -0.13 | 2.41752 |
| H 16 -- S 3  | -0.08 | 2.42667 |

|              |       |         |
|--------------|-------|---------|
| H 9 -- S 2   | -0.13 | 2.43267 |
| H 5 -- S 1   | -0.13 | 2.43671 |
| H 4 -- S 1   | -0.09 | 2.43762 |
| H 1 -- C 1   | -0.06 | 2.44238 |
| H 13 -- S 3  | -0.11 | 2.44322 |
| O 7 -- La 1  | 0.14  | 2.44995 |
| O 12 -- La 2 | 0.10  | 2.46045 |
| O 10 -- La 1 | 0.20  | 2.46433 |
| O 13 -- La 1 | 0.20  | 2.46759 |
| H 11 -- O 5  | -0.01 | 2.46809 |
| O 6 -- La 1  | 0.10  | 2.47038 |
| H 2 -- H 4   | -0.01 | 2.47139 |
| H 15 -- O 14 | -0.02 | 2.47708 |
| H 11 -- O 2  | -0.02 | 2.49152 |
| H 6 -- O 6   | -0.02 | 2.49354 |
| O 4 -- La 2  | 0.12  | 2.50400 |
| H 4 -- O 3   | 0.00  | 2.51669 |
| O 5 -- La 2  | 0.09  | 2.52942 |
| O 15 -- O 16 | -0.14 | 2.53041 |
| O 17 -- O 18 | -0.14 | 2.53559 |
| H 13 -- O 11 | -0.02 | 2.54861 |
| H 16 -- C 9  | -0.02 | 2.55786 |
| H 1 -- C 8   | -0.04 | 2.56281 |
| H 9 -- O 9   | -0.02 | 2.56619 |
| O 1 -- O 3   | -0.02 | 2.57627 |

|              |       |         |
|--------------|-------|---------|
| O 11 -- La 2 | 0.05  | 2.58019 |
| H 6 -- O 8   | -0.00 | 2.58286 |
| O 16 -- La 2 | 0.07  | 2.58875 |
| H 4 -- O 5   | -0.02 | 2.60320 |
| O 1 -- O 8   | -0.12 | 2.60939 |
| O 15 -- O 18 | -0.11 | 2.62698 |
| O 10 -- La 2 | 0.07  | 2.63020 |
| H 5 -- H 12  | -0.02 | 2.63754 |
| H 12 -- O 14 | -0.02 | 2.64251 |
| O 5 -- O 12  | -0.04 | 2.64534 |
| H 7 -- O 7   | -0.02 | 2.64975 |
| C 1 -- S 1   | -0.15 | 2.66406 |
| H 4 -- C 2   | -0.06 | 2.66532 |
| O 15 -- O 17 | -0.10 | 2.67098 |
| H 8 -- O 9   | -0.02 | 2.67229 |
| H 5 -- O 5   | -0.01 | 2.69290 |
| H 2 -- O 3   | -0.02 | 2.69315 |
| H 16 -- C 10 | -0.06 | 2.69793 |
| C 9 -- S 3   | -0.16 | 2.70251 |
| C 12 -- S 3  | -0.16 | 2.70952 |
| H 10 -- O 17 | -0.01 | 2.72478 |
| C 5 -- S 2   | -0.14 | 2.73486 |
| H 6 -- O 1   | -0.01 | 2.73517 |
| C 4 -- S 1   | -0.15 | 2.74418 |
| C 6 -- C 7   | -0.15 | 2.75476 |

|              |       |         |
|--------------|-------|---------|
| O 5 -- O 16  | -0.03 | 2.75721 |
| C 2 -- C 3   | -0.14 | 2.76296 |
| H 9 -- C 5   | -0.01 | 2.76551 |
| O 12 -- O 14 | -0.02 | 2.77292 |
| H 5 -- O 3   | -0.01 | 2.77546 |
| H 14 -- O 10 | -0.01 | 2.78790 |
| C 10 -- C 11 | -0.14 | 2.79001 |
| H 12 -- C 1  | -0.02 | 2.79092 |
| H 10 -- O 15 | -0.01 | 2.80385 |
| H 12 -- O 2  | -0.00 | 2.80838 |
| H 17 -- O 18 | -0.01 | 2.81451 |
| O 13 -- O 16 | -0.03 | 2.81608 |
| H 16 -- O 13 | -0.01 | 2.81817 |
| C 8 -- S 2   | -0.14 | 2.81909 |
| C 5 -- La 1  | -0.37 | 2.82495 |
| H 8 -- S 3   | -0.01 | 2.83553 |
| H 1 -- S 2   | 0.00  | 2.83593 |
| H 4 -- C 1   | -0.02 | 2.86178 |
| H 12 -- C 3  | -0.03 | 2.86200 |
| H 12 -- C 2  | -0.04 | 2.86695 |
| O 10 -- O 16 | -0.03 | 2.87244 |
| C 4 -- La 2  | -0.39 | 2.87290 |
| H 13 -- H 16 | -0.01 | 2.88187 |
| H 16 -- O 14 | -0.01 | 2.88291 |
| O 3 -- O 8   | -0.02 | 2.89202 |

|              |       |         |
|--------------|-------|---------|
| O 4 -- S 1   | -0.02 | 2.89369 |
| H 9 -- O 6   | -0.01 | 2.89720 |
| H 2 -- C 3   | -0.04 | 2.92616 |
| H 16 -- O 11 | -0.00 | 2.92866 |
| O 13 -- S 3  | -0.04 | 2.93241 |
| H 9 -- C 6   | -0.03 | 2.95584 |
| H 6 -- C 7   | -0.03 | 2.95588 |
| O 4 -- O 16  | -0.01 | 2.95593 |
| C 3 -- O 3   | -0.03 | 2.96006 |
| C 9 -- La 2  | -0.29 | 2.96163 |
| O 15 -- La 1 | 0.11  | 2.96296 |
| O 7 -- S 3   | -0.04 | 2.96755 |
| O 10 -- S 3  | -0.04 | 2.96998 |
| H 6 -- C 8   | -0.01 | 2.97487 |
| H 1 -- C 6   | -0.02 | 2.97725 |
| O 7 -- O 9   | -0.01 | 2.97766 |
| O 4 -- O 11  | -0.01 | 2.99155 |
| C 10 -- O 7  | -0.04 | 2.99337 |
| H 16 -- O 10 | -0.00 | 2.99404 |

---



---

#### Hirshfeld Analysis

-----

| Species | Ion | Hirshfeld Charge (e) |
|---------|-----|----------------------|
|---------|-----|----------------------|

---



---

|   |    |       |
|---|----|-------|
| H | 1  | 0.08  |
| H | 2  | 0.07  |
| H | 3  | 0.06  |
| H | 4  | 0.07  |
| H | 5  | 0.06  |
| H | 6  | 0.05  |
| H | 7  | 0.06  |
| H | 8  | 0.04  |
| H | 9  | 0.05  |
| H | 10 | 0.19  |
| H | 11 | 0.14  |
| H | 12 | 0.08  |
| H | 13 | 0.06  |
| H | 14 | 0.07  |
| H | 15 | 0.06  |
| H | 16 | 0.05  |
| H | 17 | 0.19  |
| C | 1  | 0.15  |
| C | 2  | -0.09 |
| C | 3  | -0.09 |
| C | 4  | 0.16  |
| C | 5  | 0.16  |
| C | 6  | -0.10 |
| C | 7  | -0.10 |
| C | 8  | 0.18  |

|   |    |       |
|---|----|-------|
| C | 9  | 0.18  |
| C | 10 | -0.08 |
| C | 11 | -0.10 |
| C | 12 | 0.19  |
| O | 1  | -0.15 |
| O | 2  | -0.04 |
| O | 3  | -0.21 |
| O | 4  | -0.23 |
| O | 5  | -0.23 |
| O | 6  | -0.24 |
| O | 7  | -0.24 |
| O | 8  | -0.20 |
| O | 9  | -0.26 |
| O | 10 | -0.21 |
| O | 11 | -0.22 |
| O | 12 | -0.24 |
| O | 13 | -0.23 |
| O | 14 | -0.23 |
| O | 15 | -0.33 |
| O | 16 | -0.17 |
| O | 17 | -0.21 |
| O | 18 | -0.31 |
| P | 1  | 0.44  |
| S | 1  | 0.13  |
| S | 2  | 0.03  |

|    |   |      |
|----|---|------|
| S  | 3 | 0.14 |
| La | 1 | 0.58 |
| La | 2 | 0.54 |

---

## 5. 2D Ce-TDA nanosheet

Surface optimization

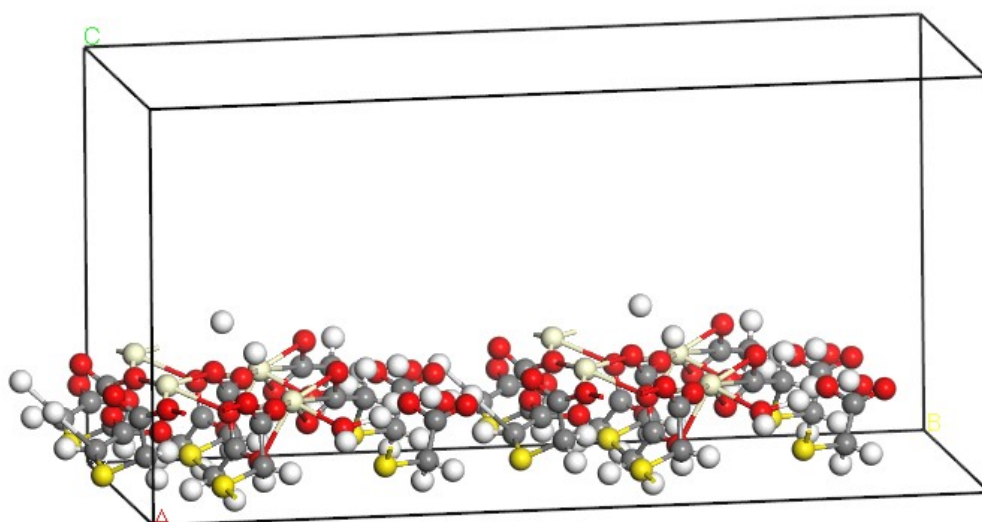

### Orbital Populations

| Ion | Atom | Orbital | Charge |
|-----|------|---------|--------|
| H   | 1    | S       | 0.508  |
| H   | 2    | S       | 0.650  |
| H   | 3    | S       | 0.645  |
| H   | 4    | S       | 0.648  |
| H   | 5    | S       | 0.648  |
| H   | 6    | S       | 0.489  |



|   |    |    |       |
|---|----|----|-------|
| H | 7  | S  | 0.646 |
| H | 8  | S  | 0.726 |
| H | 9  | S  | 0.687 |
| H | 10 | S  | 1.255 |
| H | 11 | S  | 0.590 |
| H | 12 | S  | 0.618 |
| H | 13 | S  | 0.641 |
| H | 14 | S  | 0.642 |
| H | 15 | S  | 0.682 |
| H | 16 | S  | 0.670 |
| C | 1  | S  | 0.888 |
| C | 1  | Px | 0.804 |
| C | 1  | Py | 0.758 |
| C | 1  | Pz | 0.873 |
| C | 2  | S  | 1.375 |
| C | 2  | Px | 1.222 |
| C | 2  | Py | 1.040 |
| C | 2  | Pz | 1.140 |
| C | 3  | S  | 1.355 |
| C | 3  | Px | 1.117 |
| C | 3  | Py | 1.138 |
| C | 3  | Pz | 1.117 |
| C | 4  | S  | 0.957 |
| C | 4  | Px | 0.841 |
| C | 4  | Py | 0.885 |

|   |    |    |       |
|---|----|----|-------|
| C | 4  | Pz | 0.737 |
| C | 5  | S  | 0.959 |
| C | 5  | Px | 0.786 |
| C | 5  | Py | 0.842 |
| C | 5  | Pz | 0.972 |
| C | 6  | S  | 1.228 |
| C | 6  | Px | 1.039 |
| C | 6  | Py | 1.176 |
| C | 6  | Pz | 1.125 |
| C | 7  | S  | 1.340 |
| C | 7  | Px | 1.188 |
| C | 7  | Py | 1.128 |
| C | 7  | Pz | 1.057 |
| C | 8  | S  | 0.900 |
| C | 8  | Px | 0.786 |
| C | 8  | Py | 0.770 |
| C | 8  | Pz | 0.884 |
| C | 9  | S  | 0.945 |
| C | 9  | Px | 0.831 |
| C | 9  | Py | 0.827 |
| C | 9  | Pz | 0.817 |
| C | 10 | S  | 1.362 |
| C | 10 | Px | 0.971 |
| C | 10 | Py | 1.271 |
| C | 10 | Pz | 1.158 |

|   |    |    |       |
|---|----|----|-------|
| C | 11 | S  | 1.350 |
| C | 11 | Px | 1.256 |
| C | 11 | Py | 1.056 |
| C | 11 | Pz | 1.064 |
| C | 12 | S  | 0.920 |
| C | 12 | Px | 0.775 |
| C | 12 | Py | 0.781 |
| C | 12 | Pz | 0.890 |
| O | 1  | S  | 1.866 |
| O | 1  | Px | 1.775 |
| O | 1  | Py | 1.448 |
| O | 1  | Pz | 1.941 |
| O | 2  | S  | 1.788 |
| O | 2  | Px | 1.549 |
| O | 2  | Py | 1.538 |
| O | 2  | Pz | 1.761 |
| O | 3  | S  | 1.825 |
| O | 3  | Px | 1.615 |
| O | 3  | Py | 1.488 |
| O | 3  | Pz | 1.630 |
| O | 4  | S  | 1.824 |
| O | 4  | Px | 1.651 |
| O | 4  | Py | 1.516 |
| O | 4  | Pz | 1.602 |
| O | 5  | S  | 1.824 |

|   |    |    |       |
|---|----|----|-------|
| O | 5  | Px | 1.503 |
| O | 5  | Py | 1.717 |
| O | 5  | Pz | 1.520 |
| O | 6  | S  | 1.831 |
| O | 6  | Px | 1.425 |
| O | 6  | Py | 1.712 |
| O | 6  | Pz | 1.572 |
| O | 7  | S  | 1.827 |
| O | 7  | Px | 1.729 |
| O | 7  | Py | 1.416 |
| O | 7  | Pz | 1.650 |
| O | 8  | S  | 1.823 |
| O | 8  | Px | 1.581 |
| O | 8  | Py | 1.479 |
| O | 8  | Pz | 1.669 |
| O | 9  | S  | 1.789 |
| O | 9  | Px | 1.469 |
| O | 9  | Py | 1.595 |
| O | 9  | Pz | 1.714 |
| O | 10 | S  | 1.805 |
| O | 10 | Px | 1.704 |
| O | 10 | Py | 1.615 |
| O | 10 | Pz | 1.436 |
| O | 11 | S  | 1.819 |
| O | 11 | Px | 1.464 |

|   |    |    |       |
|---|----|----|-------|
| O | 11 | Py | 1.500 |
| O | 11 | Pz | 1.766 |
| O | 12 | S  | 1.853 |
| O | 12 | Px | 1.536 |
| O | 12 | Py | 1.656 |
| O | 12 | Pz | 1.758 |
| O | 13 | S  | 1.793 |
| O | 13 | Px | 1.576 |
| O | 13 | Py | 1.505 |
| O | 13 | Pz | 1.658 |
| O | 14 | S  | 1.783 |
| O | 14 | Px | 1.460 |
| O | 14 | Py | 1.542 |
| O | 14 | Pz | 1.774 |
| S | 1  | S  | 1.784 |
| S | 1  | Px | 1.394 |
| S | 1  | Py | 1.224 |
| S | 1  | Pz | 1.430 |
| S | 2  | S  | 1.750 |
| S | 2  | Px | 0.989 |
| S | 2  | Py | 1.386 |
| S | 2  | Pz | 1.514 |
| S | 3  | S  | 1.776 |
| S | 3  | Px | 1.122 |
| S | 3  | Py | 1.222 |

|    |   |           |        |
|----|---|-----------|--------|
| S  | 3 | Pz        | 1.640  |
| Ce | 1 | S         | 1.997  |
| Ce | 1 | Px        | 1.979  |
| Ce | 1 | Py        | 1.984  |
| Ce | 1 | Pz        | 1.993  |
| Ce | 1 | Fxxx      | 0.159  |
| Ce | 1 | Fyyy      | 0.329  |
| Ce | 1 | Fzzz      | 0.194  |
| Ce | 1 | Fxyz      | 0.078  |
| Ce | 1 | Fz(xx-yy) | 0.193  |
| Ce | 1 | Fy(zz-xx) | 0.118  |
| Ce | 1 | Fx(yy-zz) | 0.085  |
| Ce | 1 | S         | 0.101  |
| Ce | 1 | Dzz       | 0.233  |
| Ce | 1 | Dzy       | 0.242  |
| Ce | 1 | Dzx       | 0.249  |
| Ce | 1 | Dxx-yy    | 0.262  |
| Ce | 1 | Dxy       | 0.229  |
| Ce | 1 | Px        | -0.020 |
| Ce | 1 | Py        | -0.030 |
| Ce | 1 | Pz        | -0.046 |
| Ce | 2 | S         | 1.995  |
| Ce | 2 | Px        | 1.985  |
| Ce | 2 | Py        | 1.986  |
| Ce | 2 | Pz        | 1.988  |

|    |   |           |        |
|----|---|-----------|--------|
| Ce | 2 | Fxxx      | 0.170  |
| Ce | 2 | Fyyy      | 0.141  |
| Ce | 2 | Fzzz      | 0.067  |
| Ce | 2 | Fxyz      | 0.270  |
| Ce | 2 | Fz(xx-yy) | 0.143  |
| Ce | 2 | Fy(zz-xx) | 0.177  |
| Ce | 2 | Fx(yy-zz) | 0.107  |
| Ce | 2 | S         | 0.127  |
| Ce | 2 | Dzz       | 0.242  |
| Ce | 2 | Dzy       | 0.346  |
| Ce | 2 | Dzx       | 0.226  |
| Ce | 2 | Dxx-yy    | 0.167  |
| Ce | 2 | Dxy       | 0.276  |
| Ce | 2 | Px        | -0.046 |
| Ce | 2 | Py        | -0.062 |
| Ce | 2 | Pz        | 0.026  |

-----  
Total: 190.000  
-----

Atomic Populations (Mulliken)

-----  
Species            Ion    s        p        d        f        Total    Charge (e)  
=====

H                    1        0.51    0.00    0.00    0.00    0.51    0.49

|   |    |      |      |      |      |      |       |
|---|----|------|------|------|------|------|-------|
| H | 2  | 0.65 | 0.00 | 0.00 | 0.00 | 0.65 | 0.35  |
| H | 3  | 0.65 | 0.00 | 0.00 | 0.00 | 0.65 | 0.35  |
| H | 4  | 0.65 | 0.00 | 0.00 | 0.00 | 0.65 | 0.35  |
| H | 5  | 0.65 | 0.00 | 0.00 | 0.00 | 0.65 | 0.35  |
| H | 6  | 0.49 | 0.00 | 0.00 | 0.00 | 0.49 | 0.51  |
| H | 7  | 0.65 | 0.00 | 0.00 | 0.00 | 0.65 | 0.35  |
| H | 8  | 0.73 | 0.00 | 0.00 | 0.00 | 0.73 | 0.27  |
| H | 9  | 0.69 | 0.00 | 0.00 | 0.00 | 0.69 | 0.31  |
| H | 10 | 1.26 | 0.00 | 0.00 | 0.00 | 1.26 | -0.26 |
| H | 11 | 0.59 | 0.00 | 0.00 | 0.00 | 0.59 | 0.41  |
| H | 12 | 0.62 | 0.00 | 0.00 | 0.00 | 0.62 | 0.38  |
| H | 13 | 0.64 | 0.00 | 0.00 | 0.00 | 0.64 | 0.36  |
| H | 14 | 0.64 | 0.00 | 0.00 | 0.00 | 0.64 | 0.36  |
| H | 15 | 0.68 | 0.00 | 0.00 | 0.00 | 0.68 | 0.32  |
| H | 16 | 0.67 | 0.00 | 0.00 | 0.00 | 0.67 | 0.33  |
| C | 1  | 0.89 | 2.44 | 0.00 | 0.00 | 3.32 | 0.68  |
| C | 2  | 1.38 | 3.40 | 0.00 | 0.00 | 4.78 | -0.78 |
| C | 3  | 1.36 | 3.37 | 0.00 | 0.00 | 4.73 | -0.73 |
| C | 4  | 0.96 | 2.46 | 0.00 | 0.00 | 3.42 | 0.58  |
| C | 5  | 0.96 | 2.60 | 0.00 | 0.00 | 3.56 | 0.44  |
| C | 6  | 1.23 | 3.34 | 0.00 | 0.00 | 4.57 | -0.57 |
| C | 7  | 1.34 | 3.37 | 0.00 | 0.00 | 4.71 | -0.71 |
| C | 8  | 0.90 | 2.44 | 0.00 | 0.00 | 3.34 | 0.66  |
| C | 9  | 0.95 | 2.48 | 0.00 | 0.00 | 3.42 | 0.58  |
| C | 10 | 1.36 | 3.40 | 0.00 | 0.00 | 4.76 | -0.76 |



|    |    |      |      |      |      |       |       |
|----|----|------|------|------|------|-------|-------|
| C  | 11 | 1.35 | 3.38 | 0.00 | 0.00 | 4.73  | -0.73 |
| C  | 12 | 0.92 | 2.45 | 0.00 | 0.00 | 3.37  | 0.63  |
| O  | 1  | 1.87 | 5.16 | 0.00 | 0.00 | 7.03  | -1.03 |
| O  | 2  | 1.79 | 4.85 | 0.00 | 0.00 | 6.63  | -0.63 |
| O  | 3  | 1.82 | 4.73 | 0.00 | 0.00 | 6.56  | -0.56 |
| O  | 4  | 1.82 | 4.77 | 0.00 | 0.00 | 6.59  | -0.59 |
| O  | 5  | 1.82 | 4.74 | 0.00 | 0.00 | 6.56  | -0.56 |
| O  | 6  | 1.83 | 4.71 | 0.00 | 0.00 | 6.54  | -0.54 |
| O  | 7  | 1.83 | 4.79 | 0.00 | 0.00 | 6.62  | -0.62 |
| O  | 8  | 1.82 | 4.73 | 0.00 | 0.00 | 6.55  | -0.55 |
| O  | 9  | 1.79 | 4.78 | 0.00 | 0.00 | 6.57  | -0.57 |
| O  | 10 | 1.81 | 4.75 | 0.00 | 0.00 | 6.56  | -0.56 |
| O  | 11 | 1.82 | 4.73 | 0.00 | 0.00 | 6.55  | -0.55 |
| O  | 12 | 1.85 | 4.95 | 0.00 | 0.00 | 6.80  | -0.80 |
| O  | 13 | 1.79 | 4.74 | 0.00 | 0.00 | 6.53  | -0.53 |
| O  | 14 | 1.78 | 4.78 | 0.00 | 0.00 | 6.56  | -0.56 |
| S  | 1  | 1.78 | 4.05 | 0.00 | 0.00 | 5.83  | 0.17  |
| S  | 2  | 1.75 | 3.89 | 0.00 | 0.00 | 5.64  | 0.36  |
| S  | 3  | 1.78 | 3.98 | 0.00 | 0.00 | 5.76  | 0.24  |
| Ce | 1  | 2.10 | 5.86 | 1.22 | 1.16 | 10.33 | 1.67  |
| Ce | 2  | 2.12 | 5.88 | 1.26 | 1.07 | 10.33 | 1.67  |

---



---

Bond

Population

Length (Å)

---



---

|              |      |         |
|--------------|------|---------|
| H 6 -- O 1   | 0.53 | 1.00594 |
| H 1 -- O 1   | 0.51 | 1.01189 |
| H 12 -- O 12 | 0.51 | 1.02265 |
| H 11 -- O 2  | 0.47 | 1.09905 |
| H 7 -- C 6   | 0.82 | 1.09951 |
| H 15 -- C 11 | 0.84 | 1.10646 |
| H 13 -- C 10 | 0.80 | 1.10728 |
| H 2 -- C 2   | 0.81 | 1.10766 |
| H 8 -- C 7   | 0.84 | 1.10932 |
| H 3 -- C 2   | 0.77 | 1.10951 |
| H 14 -- C 10 | 0.80 | 1.11112 |
| H 5 -- C 3   | 0.79 | 1.11338 |
| H 9 -- C 7   | 0.81 | 1.11460 |
| H 16 -- C 11 | 0.82 | 1.11998 |
| H 4 -- C 3   | 0.77 | 1.12561 |
| C 1 -- O 3   | 1.07 | 1.21807 |
| C 8 -- O 8   | 1.08 | 1.22044 |
| C 12 -- O 13 | 0.93 | 1.25788 |
| C 9 -- O 11  | 0.96 | 1.26034 |
| C 12 -- O 14 | 0.90 | 1.26539 |
| C 4 -- O 4   | 0.92 | 1.27601 |
| C 4 -- O 5   | 0.89 | 1.28028 |
| C 9 -- O 10  | 0.89 | 1.28169 |
| C 5 -- O 7   | 0.77 | 1.31773 |
| C 8 -- O 9   | 0.74 | 1.31891 |

|              |       |         |
|--------------|-------|---------|
| C 5 -- O 6   | 0.77  | 1.31951 |
| C 1 -- O 2   | 0.69  | 1.32418 |
| H 11 -- O 12 | 0.22  | 1.35269 |
| C 5 -- C 6   | 1.08  | 1.37936 |
| C 3 -- C 4   | 0.71  | 1.47815 |
| C 9 -- C 10  | 0.71  | 1.48642 |
| C 11 -- C 12 | 0.74  | 1.49976 |
| C 1 -- C 2   | 0.70  | 1.50692 |
| C 7 -- C 8   | 0.68  | 1.51300 |
| H 1 -- H 6   | -0.16 | 1.57951 |
| C 6 -- S 2   | 0.69  | 1.69550 |
| H 11 -- H 12 | -0.05 | 1.74007 |
| C 7 -- S 2   | 0.53  | 1.77951 |
| H 4 -- H 5   | -0.09 | 1.78383 |
| C 10 -- S 3  | 0.54  | 1.78825 |
| H 1 -- O 2   | 0.06  | 1.79809 |
| C 2 -- S 1   | 0.48  | 1.79905 |
| H 2 -- H 3   | -0.10 | 1.79928 |
| C 3 -- S 1   | 0.50  | 1.80138 |
| H 13 -- H 14 | -0.08 | 1.80646 |
| C 11 -- S 3  | 0.51  | 1.81222 |
| H 15 -- H 16 | -0.08 | 1.81275 |
| H 8 -- H 9   | -0.08 | 1.81462 |
| H 11 -- C 1  | -0.13 | 2.08002 |
| H 10 -- Ce 2 | 0.32  | 2.09605 |

|              |       |         |
|--------------|-------|---------|
| H 9 -- O 7   | 0.02  | 2.09793 |
| H 14 -- C 9  | -0.11 | 2.09945 |
| H 7 -- C 5   | -0.13 | 2.11718 |
| H 5 -- C 4   | -0.13 | 2.11873 |
| H 9 -- C 8   | -0.13 | 2.12026 |
| H 13 -- C 9  | -0.14 | 2.12111 |
| H 2 -- C 1   | -0.14 | 2.12151 |
| H 16 -- C 12 | -0.11 | 2.12311 |
| H 4 -- C 4   | -0.11 | 2.12828 |
| H 15 -- C 12 | -0.12 | 2.14395 |
| H 3 -- C 1   | -0.12 | 2.14770 |
| H 12 -- S 1  | 0.14  | 2.16230 |
| O 12 -- Ce 2 | 0.25  | 2.16275 |
| O 9 -- Ce 1  | 0.30  | 2.17349 |
| H 8 -- C 8   | -0.10 | 2.18495 |
| H 4 -- O 1   | 0.03  | 2.18715 |
| O 6 -- O 7   | -0.19 | 2.19411 |
| O 6 -- Ce 1  | 0.20  | 2.20704 |
| O 4 -- O 5   | -0.20 | 2.21362 |
| O 10 -- O 11 | -0.19 | 2.21701 |
| O 13 -- O 14 | -0.18 | 2.22079 |
| O 2 -- O 3   | -0.19 | 2.22351 |
| O 8 -- O 9   | -0.18 | 2.24969 |
| H 6 -- H 7   | -0.04 | 2.26873 |
| O 14 -- Ce 2 | 0.23  | 2.29570 |

|              |       |         |
|--------------|-------|---------|
| O 13 -- Ce 1 | 0.19  | 2.30687 |
| O 7 -- Ce 1  | 0.23  | 2.31284 |
| O 5 -- Ce 2  | 0.11  | 2.31851 |
| C 6 -- O 6   | -0.20 | 2.34119 |
| H 14 -- S 3  | -0.10 | 2.34239 |
| H 8 -- S 2   | -0.13 | 2.35217 |
| C 7 -- O 9   | -0.22 | 2.35435 |
| H 3 -- S 1   | -0.11 | 2.35658 |
| C 10 -- O 11 | -0.20 | 2.35892 |
| C 2 -- O 3   | -0.22 | 2.36073 |
| H 7 -- S 2   | -0.13 | 2.36362 |
| H 6 -- O 8   | 0.03  | 2.36364 |
| C 11 -- O 14 | -0.21 | 2.36626 |
| C 3 -- O 5   | -0.20 | 2.37236 |
| H 7 -- O 1   | -0.00 | 2.38142 |
| C 11 -- O 13 | -0.22 | 2.38217 |
| O 11 -- Ce 2 | 0.06  | 2.39622 |
| H 9 -- S 2   | -0.11 | 2.39690 |
| H 2 -- S 1   | -0.13 | 2.39891 |
| C 7 -- O 8   | -0.20 | 2.40431 |
| C 10 -- O 10 | -0.20 | 2.40435 |
| C 3 -- O 4   | -0.20 | 2.40526 |
| H 16 -- S 3  | -0.09 | 2.40857 |
| H 16 -- O 4  | 0.01  | 2.41149 |
| C 6 -- O 7   | -0.18 | 2.41469 |

|              |       |         |
|--------------|-------|---------|
| H 15 -- S 3  | -0.13 | 2.41512 |
| H 1 -- H 11  | -0.02 | 2.42271 |
| C 2 -- O 2   | -0.21 | 2.43256 |
| H 13 -- S 3  | -0.11 | 2.43566 |
| O 2 -- O 12  | -0.17 | 2.44036 |
| H 5 -- S 1   | -0.12 | 2.44272 |
| H 2 -- O 3   | -0.03 | 2.44314 |
| H 4 -- S 1   | -0.10 | 2.45148 |
| O 10 -- Ce 1 | 0.15  | 2.45151 |
| O 4 -- Ce 2  | 0.12  | 2.45686 |
| H 14 -- O 7  | -0.01 | 2.47375 |
| H 6 -- C 6   | -0.05 | 2.48073 |
| H 1 -- C 1   | -0.05 | 2.50289 |
| H 15 -- O 14 | -0.02 | 2.50569 |
| H 10 -- O 10 | -0.03 | 2.50880 |
| H 13 -- O 11 | -0.02 | 2.53904 |
| H 7 -- O 6   | -0.02 | 2.54726 |
| H 1 -- H 4   | -0.03 | 2.54873 |
| H 8 -- O 9   | -0.02 | 2.55116 |
| O 10 -- Ce 2 | 0.06  | 2.56341 |
| H 11 -- C 2  | -0.04 | 2.58507 |
| H 13 -- H 16 | -0.01 | 2.60800 |
| H 16 -- C 10 | -0.06 | 2.62495 |
| O 7 -- O 10  | -0.04 | 2.62524 |
| H 8 -- S 3   | -0.03 | 2.63772 |

|              |       |         |
|--------------|-------|---------|
| H 5 -- O 5   | -0.01 | 2.64134 |
| H 3 -- H 11  | -0.01 | 2.67226 |
| H 2 -- H 4   | 0.00  | 2.67277 |
| O 6 -- O 9   | -0.02 | 2.68010 |
| C 5 -- Ce 1  | -0.45 | 2.68432 |
| H 12 -- O 2  | -0.01 | 2.68989 |
| H 4 -- O 5   | -0.01 | 2.69183 |
| C 4 -- S 1   | -0.17 | 2.69187 |
| H 9 -- C 5   | -0.02 | 2.72495 |
| C 2 -- C 3   | -0.15 | 2.72554 |
| H 3 -- O 2   | -0.01 | 2.73863 |
| O 9 -- O 13  | -0.03 | 2.73992 |
| H 12 -- O 14 | -0.01 | 2.74136 |
| C 8 -- S 2   | -0.17 | 2.74192 |
| C 4 -- Ce 2  | -0.39 | 2.74408 |
| C 9 -- S 3   | -0.15 | 2.75022 |
| H 6 -- S 2   | -0.02 | 2.75022 |
| H 5 -- C 1   | -0.02 | 2.75320 |
| C 6 -- C 7   | -0.16 | 2.75482 |
| C 9 -- O 7   | -0.03 | 2.75538 |
| H 9 -- O 9   | -0.01 | 2.75898 |
| C 12 -- S 3  | -0.14 | 2.76965 |
| O 10 -- O 13 | -0.03 | 2.77086 |
| H 16 -- C 9  | -0.01 | 2.77776 |
| H 14 -- O 11 | -0.01 | 2.77849 |

|              |       |         |
|--------------|-------|---------|
| O 1 -- O 2   | -0.06 | 2.77873 |
| C 5 -- S 2   | -0.16 | 2.78168 |
| C 10 -- C 11 | -0.14 | 2.79922 |
| O 12 -- O 14 | -0.02 | 2.80100 |
| H 9 -- C 6   | -0.04 | 2.81287 |
| C 1 -- S 1   | -0.12 | 2.81627 |
| C 9 -- Ce 2  | -0.33 | 2.81849 |
| O 4 -- S 1   | -0.02 | 2.82819 |
| H 16 -- O 13 | -0.01 | 2.86290 |
| H 2 -- H 7   | -0.01 | 2.86668 |
| O 4 -- O 11  | -0.02 | 2.86837 |
| C 9 -- O 4   | -0.02 | 2.87602 |
| H 15 -- O 11 | -0.00 | 2.87695 |
| S 3 -- Ce 1  | 0.22  | 2.88108 |
| H 4 -- C 2   | -0.03 | 2.88580 |
| H 16 -- O 14 | -0.01 | 2.89020 |
| H 1 -- O 3   | -0.01 | 2.89316 |
| O 4 -- O 10  | -0.02 | 2.90393 |
| H 12 -- C 2  | -0.03 | 2.91064 |
| H 12 -- Ce 2 | -0.15 | 2.91107 |
| H 16 -- O 10 | -0.00 | 2.91117 |
| C 10 -- O 7  | -0.04 | 2.91978 |
| O 10 -- S 3  | -0.04 | 2.92558 |
| H 9 -- O 8   | -0.01 | 2.93455 |
| H 11 -- S 1  | -0.01 | 2.93765 |



|              |       |         |
|--------------|-------|---------|
| H 5 -- C 2   | -0.02 | 2.93982 |
| C 7 -- O 7   | -0.07 | 2.94763 |
| H 2 -- C 3   | -0.03 | 2.94862 |
| O 5 -- O 12  | -0.01 | 2.96167 |
| C 6 -- O 1   | -0.05 | 2.96667 |
| O 8 -- S 2   | -0.04 | 2.97569 |
| O 13 -- S 3  | -0.03 | 2.98325 |
| H 14 -- O 10 | 0.00  | 2.98664 |
| H 3 -- H 12  | -0.01 | 2.99930 |

---

#### Hirshfeld Analysis

-----

| Species | Ion | Hirshfeld Charge (e) |
|---------|-----|----------------------|
| H       | 1   | 0.09                 |
| H       | 2   | 0.06                 |
| H       | 3   | 0.07                 |
| H       | 4   | 0.06                 |
| H       | 5   | 0.07                 |
| H       | 6   | 0.10                 |
| H       | 7   | 0.05                 |
| H       | 8   | 0.04                 |

|   |    |       |
|---|----|-------|
| H | 9  | 0.04  |
| H | 10 | -0.17 |
| H | 11 | 0.09  |
| H | 12 | 0.09  |
| H | 13 | 0.07  |
| H | 14 | 0.08  |
| H | 15 | 0.06  |
| H | 16 | 0.06  |
| C | 1  | 0.16  |
| C | 2  | -0.09 |
| C | 3  | -0.09 |
| C | 4  | 0.18  |
| C | 5  | 0.11  |
| C | 6  | -0.09 |
| C | 7  | -0.11 |
| C | 8  | 0.18  |
| C | 9  | 0.19  |
| C | 10 | -0.08 |
| C | 11 | -0.08 |
| C | 12 | 0.21  |
| O | 1  | -0.30 |
| O | 2  | -0.15 |
| O | 3  | -0.24 |
| O | 4  | -0.21 |
| O | 5  | -0.21 |

|    |    |       |
|----|----|-------|
| O  | 6  | -0.22 |
| O  | 7  | -0.22 |
| O  | 8  | -0.23 |
| O  | 9  | -0.23 |
| O  | 10 | -0.18 |
| O  | 11 | -0.20 |
| O  | 12 | -0.28 |
| O  | 13 | -0.20 |
| O  | 14 | -0.20 |
| S  | 1  | 0.10  |
| S  | 2  | 0.13  |
| S  | 3  | 0.16  |
| Ce | 1  | 0.67  |
| Ce | 2  | 0.58  |

---

## 6. 2D Ce-TDA adsorption

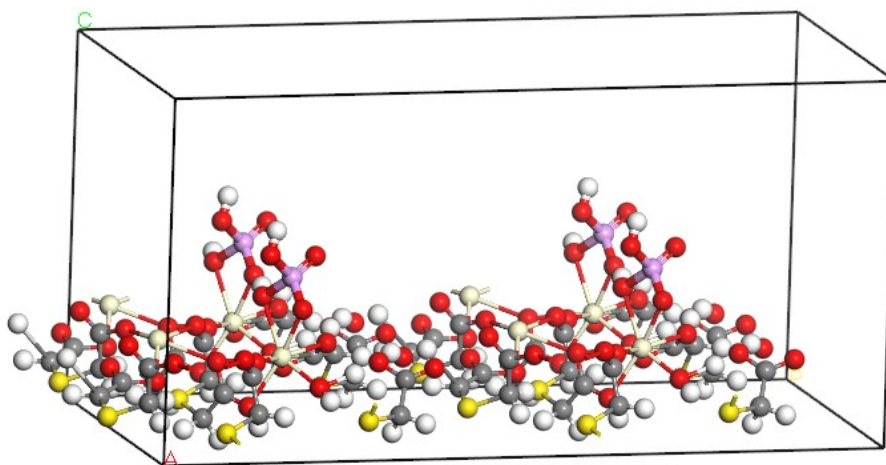

## Orbital Populations

| Ion | Atom | Orbital | Charge |
|-----|------|---------|--------|
| H   | 1    | S       | 0.502  |
| H   | 2    | S       | 0.649  |
| H   | 3    | S       | 0.643  |
| H   | 4    | S       | 0.656  |
| H   | 5    | S       | 0.654  |
| H   | 6    | S       | 0.478  |
| H   | 7    | S       | 0.645  |
| H   | 8    | S       | 0.724  |
| H   | 9    | S       | 0.679  |
| H   | 10   | S       | 0.471  |
| H   | 11   | S       | 0.595  |
| H   | 12   | S       | 0.638  |
| H   | 13   | S       | 0.643  |
| H   | 14   | S       | 0.652  |
| H   | 15   | S       | 0.695  |
| H   | 16   | S       | 0.667  |
| H   | 17   | S       | 0.433  |
| C   | 1    | S       | 0.887  |
| C   | 1    | Px      | 0.829  |
| C   | 1    | Py      | 0.732  |
| C   | 1    | Pz      | 0.871  |
| C   | 2    | S       | 1.375  |

|   |   |    |       |
|---|---|----|-------|
| C | 2 | Px | 1.192 |
| C | 2 | Py | 1.070 |
| C | 2 | Pz | 1.142 |
| C | 3 | S  | 1.356 |
| C | 3 | Px | 1.120 |
| C | 3 | Py | 1.169 |
| C | 3 | Pz | 1.079 |
| C | 4 | S  | 0.953 |
| C | 4 | Px | 0.825 |
| C | 4 | Py | 0.844 |
| C | 4 | Pz | 0.799 |
| C | 5 | S  | 0.959 |
| C | 5 | Px | 0.778 |
| C | 5 | Py | 0.846 |
| C | 5 | Pz | 0.971 |
| C | 6 | S  | 1.229 |
| C | 6 | Px | 1.033 |
| C | 6 | Py | 1.170 |
| C | 6 | Pz | 1.125 |
| C | 7 | S  | 1.341 |
| C | 7 | Px | 1.207 |
| C | 7 | Py | 1.116 |
| C | 7 | Pz | 1.056 |
| C | 8 | S  | 0.894 |
| C | 8 | Px | 0.768 |

|   |    |    |       |
|---|----|----|-------|
| C | 8  | Py | 0.790 |
| C | 8  | Pz | 0.883 |
| C | 9  | S  | 0.939 |
| C | 9  | Px | 0.841 |
| C | 9  | Py | 0.827 |
| C | 9  | Pz | 0.814 |
| C | 10 | S  | 1.363 |
| C | 10 | Px | 0.964 |
| C | 10 | Py | 1.267 |
| C | 10 | Pz | 1.166 |
| C | 11 | S  | 1.349 |
| C | 11 | Px | 1.249 |
| C | 11 | Py | 1.069 |
| C | 11 | Pz | 1.060 |
| C | 12 | S  | 0.925 |
| C | 12 | Px | 0.759 |
| C | 12 | Py | 0.799 |
| C | 12 | Pz | 0.888 |
| O | 1  | S  | 1.866 |
| O | 1  | Px | 1.794 |
| O | 1  | Py | 1.449 |
| O | 1  | Pz | 1.916 |
| O | 2  | S  | 1.789 |
| O | 2  | Px | 1.614 |
| O | 2  | Py | 1.476 |

|   |   |    |       |
|---|---|----|-------|
| O | 2 | Pz | 1.734 |
| O | 3 | S  | 1.824 |
| O | 3 | Px | 1.593 |
| O | 3 | Py | 1.512 |
| O | 3 | Pz | 1.631 |
| O | 4 | S  | 1.823 |
| O | 4 | Px | 1.729 |
| O | 4 | Py | 1.459 |
| O | 4 | Pz | 1.602 |
| O | 5 | S  | 1.824 |
| O | 5 | Px | 1.443 |
| O | 5 | Py | 1.730 |
| O | 5 | Pz | 1.549 |
| O | 6 | S  | 1.831 |
| O | 6 | Px | 1.420 |
| O | 6 | Py | 1.717 |
| O | 6 | Pz | 1.571 |
| O | 7 | S  | 1.828 |
| O | 7 | Px | 1.728 |
| O | 7 | Py | 1.419 |
| O | 7 | Pz | 1.637 |
| O | 8 | S  | 1.822 |
| O | 8 | Px | 1.593 |
| O | 8 | Py | 1.474 |
| O | 8 | Pz | 1.670 |

|   |    |    |       |
|---|----|----|-------|
| O | 9  | S  | 1.788 |
| O | 9  | Px | 1.447 |
| O | 9  | Py | 1.602 |
| O | 9  | Pz | 1.727 |
| O | 10 | S  | 1.809 |
| O | 10 | Px | 1.705 |
| O | 10 | Py | 1.615 |
| O | 10 | Pz | 1.447 |
| O | 11 | S  | 1.818 |
| O | 11 | Px | 1.478 |
| O | 11 | Py | 1.493 |
| O | 11 | Pz | 1.757 |
| O | 12 | S  | 1.844 |
| O | 12 | Px | 1.541 |
| O | 12 | Py | 1.673 |
| O | 12 | Pz | 1.725 |
| O | 13 | S  | 1.794 |
| O | 13 | Px | 1.581 |
| O | 13 | Py | 1.509 |
| O | 13 | Pz | 1.661 |
| O | 14 | S  | 1.786 |
| O | 14 | Px | 1.442 |
| O | 14 | Py | 1.538 |
| O | 14 | Pz | 1.771 |
| O | 15 | S  | 1.908 |



|   |    |    |       |
|---|----|----|-------|
| O | 15 | Px | 1.725 |
| O | 15 | Py | 1.667 |
| O | 15 | Pz | 1.726 |
| O | 16 | S  | 1.870 |
| O | 16 | Px | 1.702 |
| O | 16 | Py | 1.760 |
| O | 16 | Pz | 1.577 |
| O | 17 | S  | 1.867 |
| O | 17 | Px | 1.864 |
| O | 17 | Py | 1.792 |
| O | 17 | Pz | 1.491 |
| O | 18 | S  | 1.854 |
| O | 18 | Px | 1.509 |
| O | 18 | Py | 1.851 |
| O | 18 | Pz | 1.751 |
| P | 1  | S  | 0.901 |
| P | 1  | Px | 0.624 |
| P | 1  | Py | 0.580 |
| P | 1  | Pz | 0.598 |
| S | 1  | S  | 1.781 |
| S | 1  | Px | 1.388 |
| S | 1  | Py | 1.252 |
| S | 1  | Pz | 1.385 |
| S | 2  | S  | 1.751 |
| S | 2  | Px | 0.972 |

|    |   |           |        |
|----|---|-----------|--------|
| S  | 2 | Py        | 1.349  |
| S  | 2 | Pz        | 1.527  |
| S  | 3 | S         | 1.773  |
| S  | 3 | Px        | 1.106  |
| S  | 3 | Py        | 1.235  |
| S  | 3 | Pz        | 1.650  |
| Ce | 1 | S         | 1.997  |
| Ce | 1 | Px        | 1.979  |
| Ce | 1 | Py        | 1.985  |
| Ce | 1 | Pz        | 1.993  |
| Ce | 1 | Fxxx      | 0.170  |
| Ce | 1 | Fyyy      | 0.309  |
| Ce | 1 | Fzzz      | 0.218  |
| Ce | 1 | Fxyz      | 0.083  |
| Ce | 1 | Fz(xx-yy) | 0.168  |
| Ce | 1 | Fy(zz-xx) | 0.127  |
| Ce | 1 | Fx(yy-zz) | 0.080  |
| Ce | 1 | S         | 0.095  |
| Ce | 1 | Dzz       | 0.232  |
| Ce | 1 | Dzy       | 0.241  |
| Ce | 1 | Dzx       | 0.242  |
| Ce | 1 | Dxx-yy    | 0.264  |
| Ce | 1 | Dxy       | 0.232  |
| Ce | 1 | Px        | -0.023 |
| Ce | 1 | Py        | -0.031 |

|    |   |           |        |
|----|---|-----------|--------|
| Ce | 1 | Pz        | -0.042 |
| Ce | 2 | S         | 1.995  |
| Ce | 2 | Px        | 1.982  |
| Ce | 2 | Py        | 1.987  |
| Ce | 2 | Pz        | 1.989  |
| Ce | 2 | Fxxx      | 0.174  |
| Ce | 2 | Fyyy      | 0.140  |
| Ce | 2 | Fzzz      | 0.100  |
| Ce | 2 | Fxyz      | 0.139  |
| Ce | 2 | Fz(xx-yy) | 0.156  |
| Ce | 2 | Fy(zz-xx) | 0.172  |
| Ce | 2 | Fx(yy-zz) | 0.164  |
| Ce | 2 | S         | 0.096  |
| Ce | 2 | Dzz       | 0.265  |
| Ce | 2 | Dzy       | 0.225  |
| Ce | 2 | Dzx       | 0.258  |
| Ce | 2 | Dxx-yy    | 0.213  |
| Ce | 2 | Dxy       | 0.252  |
| Ce | 2 | Px        | -0.047 |
| Ce | 2 | Py        | -0.052 |
| Ce | 2 | Pz        | -0.042 |

---

Total: 220.000

---

## Atomic Populations (Mulliken)

-----

| Species | Ion | s    | p    | d    | f    | Total | Charge (e) |
|---------|-----|------|------|------|------|-------|------------|
| H       | 1   | 0.50 | 0.00 | 0.00 | 0.00 | 0.50  | 0.50       |
| H       | 2   | 0.65 | 0.00 | 0.00 | 0.00 | 0.65  | 0.35       |
| H       | 3   | 0.64 | 0.00 | 0.00 | 0.00 | 0.64  | 0.36       |
| H       | 4   | 0.66 | 0.00 | 0.00 | 0.00 | 0.66  | 0.34       |
| H       | 5   | 0.65 | 0.00 | 0.00 | 0.00 | 0.65  | 0.35       |
| H       | 6   | 0.48 | 0.00 | 0.00 | 0.00 | 0.48  | 0.52       |
| H       | 7   | 0.65 | 0.00 | 0.00 | 0.00 | 0.65  | 0.35       |
| H       | 8   | 0.72 | 0.00 | 0.00 | 0.00 | 0.72  | 0.28       |
| H       | 9   | 0.68 | 0.00 | 0.00 | 0.00 | 0.68  | 0.32       |
| H       | 10  | 0.47 | 0.00 | 0.00 | 0.00 | 0.47  | 0.53       |
| H       | 11  | 0.60 | 0.00 | 0.00 | 0.00 | 0.60  | 0.40       |
| H       | 12  | 0.64 | 0.00 | 0.00 | 0.00 | 0.64  | 0.36       |
| H       | 13  | 0.64 | 0.00 | 0.00 | 0.00 | 0.64  | 0.36       |
| H       | 14  | 0.65 | 0.00 | 0.00 | 0.00 | 0.65  | 0.35       |
| H       | 15  | 0.70 | 0.00 | 0.00 | 0.00 | 0.70  | 0.30       |
| H       | 16  | 0.67 | 0.00 | 0.00 | 0.00 | 0.67  | 0.33       |
| H       | 17  | 0.43 | 0.00 | 0.00 | 0.00 | 0.43  | 0.57       |
| C       | 1   | 0.89 | 2.43 | 0.00 | 0.00 | 3.32  | 0.68       |
| C       | 2   | 1.37 | 3.40 | 0.00 | 0.00 | 4.78  | -0.78      |
| C       | 3   | 1.36 | 3.37 | 0.00 | 0.00 | 4.72  | -0.72      |
| C       | 4   | 0.95 | 2.47 | 0.00 | 0.00 | 3.42  | 0.58       |

|   |    |      |      |      |      |      |       |
|---|----|------|------|------|------|------|-------|
| C | 5  | 0.96 | 2.60 | 0.00 | 0.00 | 3.55 | 0.45  |
| C | 6  | 1.23 | 3.33 | 0.00 | 0.00 | 4.56 | -0.56 |
| C | 7  | 1.34 | 3.38 | 0.00 | 0.00 | 4.72 | -0.72 |
| C | 8  | 0.89 | 2.44 | 0.00 | 0.00 | 3.33 | 0.67  |
| C | 9  | 0.94 | 2.48 | 0.00 | 0.00 | 3.42 | 0.58  |
| C | 10 | 1.36 | 3.40 | 0.00 | 0.00 | 4.76 | -0.76 |
| C | 11 | 1.35 | 3.38 | 0.00 | 0.00 | 4.73 | -0.73 |
| C | 12 | 0.92 | 2.45 | 0.00 | 0.00 | 3.37 | 0.63  |
| O | 1  | 1.87 | 5.16 | 0.00 | 0.00 | 7.02 | -1.02 |
| O | 2  | 1.79 | 4.82 | 0.00 | 0.00 | 6.61 | -0.61 |
| O | 3  | 1.82 | 4.74 | 0.00 | 0.00 | 6.56 | -0.56 |
| O | 4  | 1.82 | 4.79 | 0.00 | 0.00 | 6.61 | -0.61 |
| O | 5  | 1.82 | 4.72 | 0.00 | 0.00 | 6.55 | -0.55 |
| O | 6  | 1.83 | 4.71 | 0.00 | 0.00 | 6.54 | -0.54 |
| O | 7  | 1.83 | 4.78 | 0.00 | 0.00 | 6.61 | -0.61 |
| O | 8  | 1.82 | 4.74 | 0.00 | 0.00 | 6.56 | -0.56 |
| O | 9  | 1.79 | 4.78 | 0.00 | 0.00 | 6.56 | -0.56 |
| O | 10 | 1.81 | 4.77 | 0.00 | 0.00 | 6.58 | -0.58 |
| O | 11 | 1.82 | 4.73 | 0.00 | 0.00 | 6.55 | -0.55 |
| O | 12 | 1.84 | 4.94 | 0.00 | 0.00 | 6.78 | -0.78 |
| O | 13 | 1.79 | 4.75 | 0.00 | 0.00 | 6.55 | -0.55 |
| O | 14 | 1.79 | 4.75 | 0.00 | 0.00 | 6.54 | -0.54 |
| O | 15 | 1.91 | 5.12 | 0.00 | 0.00 | 7.03 | -1.03 |
| O | 16 | 1.87 | 5.04 | 0.00 | 0.00 | 6.91 | -0.91 |
| O | 17 | 1.87 | 5.15 | 0.00 | 0.00 | 7.01 | -1.01 |

|    |    |      |      |      |      |       |       |
|----|----|------|------|------|------|-------|-------|
| O  | 18 | 1.85 | 5.11 | 0.00 | 0.00 | 6.96  | -0.96 |
| P  | 1  | 0.90 | 1.80 | 0.00 | 0.00 | 2.70  | 2.30  |
| S  | 1  | 1.78 | 4.02 | 0.00 | 0.00 | 5.81  | 0.19  |
| S  | 2  | 1.75 | 3.85 | 0.00 | 0.00 | 5.60  | 0.40  |
| S  | 3  | 1.77 | 3.99 | 0.00 | 0.00 | 5.76  | 0.24  |
| Ce | 1  | 2.09 | 5.86 | 1.21 | 1.16 | 10.32 | 1.68  |
| Ce | 2  | 2.09 | 5.82 | 1.21 | 1.04 | 10.16 | 1.84  |

---

| Bond         | Population | Length (A) |
|--------------|------------|------------|
| H 10 -- O 18 | 0.54       | 0.99545    |
| H 17 -- O 17 | 0.50       | 0.99637    |
| H 6 -- O 1   | 0.52       | 0.99956    |
| H 1 -- O 1   | 0.53       | 1.00884    |
| H 12 -- O 12 | 0.50       | 1.03641    |
| H 11 -- O 2  | 0.52       | 1.06429    |
| H 7 -- C 6   | 0.82       | 1.10126    |
| H 2 -- C 2   | 0.81       | 1.10607    |
| H 13 -- C 10 | 0.80       | 1.10682    |
| H 8 -- C 7   | 0.85       | 1.10755    |
| H 15 -- C 11 | 0.85       | 1.10765    |
| H 3 -- C 2   | 0.77       | 1.11100    |
| H 14 -- C 10 | 0.80       | 1.11226    |
| H 9 -- C 7   | 0.80       | 1.11416    |

|              |       |         |
|--------------|-------|---------|
| H 5 -- C 3   | 0.79  | 1.11482 |
| H 16 -- C 11 | 0.81  | 1.11758 |
| H 4 -- C 3   | 0.78  | 1.12263 |
| C 1 -- O 3   | 1.08  | 1.21743 |
| C 8 -- O 8   | 1.08  | 1.21833 |
| C 12 -- O 14 | 0.94  | 1.25599 |
| C 9 -- O 11  | 0.95  | 1.26188 |
| C 12 -- O 13 | 0.90  | 1.26992 |
| C 4 -- O 5   | 0.91  | 1.27438 |
| C 4 -- O 4   | 0.92  | 1.27505 |
| C 9 -- O 10  | 0.91  | 1.27739 |
| C 5 -- O 6   | 0.78  | 1.31465 |
| C 8 -- O 9   | 0.75  | 1.31551 |
| C 5 -- O 7   | 0.77  | 1.31756 |
| C 1 -- O 2   | 0.69  | 1.32409 |
| C 5 -- C 6   | 1.06  | 1.38469 |
| O 15 -- P 1  | 0.87  | 1.46853 |
| C 3 -- C 4   | 0.70  | 1.48385 |
| H 11 -- O 12 | 0.16  | 1.49070 |
| C 9 -- C 10  | 0.71  | 1.49366 |
| C 11 -- C 12 | 0.74  | 1.49974 |
| C 1 -- C 2   | 0.70  | 1.50771 |
| C 7 -- C 8   | 0.68  | 1.50995 |
| O 16 -- P 1  | 0.58  | 1.52972 |
| H 1 -- H 6   | -0.15 | 1.57571 |

|              |       |         |
|--------------|-------|---------|
| O 17 -- P 1  | 0.41  | 1.59672 |
| O 18 -- P 1  | 0.34  | 1.66183 |
| C 6 -- S 2   | 0.71  | 1.68808 |
| C 7 -- S 2   | 0.53  | 1.77951 |
| H 11 -- H 12 | -0.04 | 1.78548 |
| C 10 -- S 3  | 0.54  | 1.79038 |
| H 13 -- H 14 | -0.09 | 1.79354 |
| C 3 -- S 1   | 0.48  | 1.79740 |
| C 2 -- S 1   | 0.49  | 1.79955 |
| H 2 -- H 3   | -0.09 | 1.80045 |
| C 11 -- S 3  | 0.51  | 1.80967 |
| H 4 -- H 5   | -0.08 | 1.81030 |
| H 15 -- H 16 | -0.08 | 1.81779 |
| H 8 -- H 9   | -0.07 | 1.82465 |
| H 1 -- O 2   | 0.04  | 1.87359 |
| H 12 -- S 1  | 0.18  | 1.99476 |
| H 11 -- C 1  | -0.15 | 2.03197 |
| H 4 -- O 1   | 0.04  | 2.06016 |
| H 9 -- O 7   | 0.02  | 2.06528 |
| H 14 -- C 9  | -0.11 | 2.09836 |
| O 12 -- Ce 2 | 0.33  | 2.10213 |
| H 2 -- C 1   | -0.15 | 2.10334 |
| H 16 -- C 12 | -0.11 | 2.10966 |
| H 9 -- C 8   | -0.13 | 2.11202 |
| H 17 -- P 1  | -0.15 | 2.11649 |



|              |       |         |
|--------------|-------|---------|
| H 5 -- C 4   | -0.12 | 2.12093 |
| H 7 -- C 5   | -0.13 | 2.12122 |
| H 4 -- C 4   | -0.12 | 2.12449 |
| H 3 -- C 1   | -0.11 | 2.14412 |
| H 13 -- C 9  | -0.13 | 2.14438 |
| H 15 -- C 12 | -0.12 | 2.15636 |
| O 9 -- Ce 1  | 0.31  | 2.16542 |
| H 8 -- C 8   | -0.10 | 2.17685 |
| O 6 -- O 7   | -0.19 | 2.19775 |
| O 4 -- O 5   | -0.20 | 2.21088 |
| O 2 -- O 3   | -0.20 | 2.21528 |
| O 6 -- Ce 1  | 0.20  | 2.22067 |
| O 13 -- O 14 | -0.18 | 2.22660 |
| O 16 -- Ce 2 | 0.17  | 2.22664 |
| O 10 -- O 11 | -0.19 | 2.22776 |
| H 10 -- P 1  | -0.09 | 2.22885 |
| O 8 -- O 9   | -0.18 | 2.25065 |
| O 13 -- Ce 1 | 0.21  | 2.29391 |
| O 7 -- Ce 1  | 0.22  | 2.30604 |
| O 14 -- Ce 2 | 0.20  | 2.32642 |
| H 14 -- S 3  | -0.10 | 2.33403 |
| C 6 -- O 6   | -0.20 | 2.34010 |
| O 5 -- Ce 2  | 0.11  | 2.34249 |
| C 10 -- O 11 | -0.21 | 2.34297 |
| H 16 -- O 4  | 0.02  | 2.34405 |

|              |       |         |
|--------------|-------|---------|
| H 7 -- S 2   | -0.13 | 2.34680 |
| H 3 -- S 1   | -0.11 | 2.35104 |
| C 7 -- O 9   | -0.23 | 2.35282 |
| C 2 -- O 3   | -0.22 | 2.35943 |
| H 8 -- S 2   | -0.13 | 2.36148 |
| C 3 -- O 5   | -0.21 | 2.36504 |
| C 11 -- O 13 | -0.22 | 2.36788 |
| O 16 -- O 18 | -0.16 | 2.36905 |
| C 11 -- O 14 | -0.21 | 2.37864 |
| H 9 -- S 2   | -0.11 | 2.38214 |
| O 11 -- Ce 2 | 0.05  | 2.38314 |
| C 7 -- O 8   | -0.21 | 2.39041 |
| H 2 -- S 1   | -0.13 | 2.40272 |
| H 5 -- S 1   | -0.12 | 2.41129 |
| C 3 -- O 4   | -0.20 | 2.41355 |
| C 6 -- O 7   | -0.18 | 2.41421 |
| C 10 -- O 10 | -0.19 | 2.41567 |
| H 16 -- S 3  | -0.08 | 2.41676 |
| H 2 -- O 3   | -0.03 | 2.41978 |
| H 13 -- S 3  | -0.11 | 2.42843 |
| H 15 -- S 3  | -0.13 | 2.42870 |
| H 14 -- O 7  | -0.01 | 2.43301 |
| C 2 -- O 2   | -0.20 | 2.44331 |
| H 1 -- H 4   | -0.03 | 2.44527 |
| H 4 -- S 1   | -0.10 | 2.45055 |

|              |       |         |
|--------------|-------|---------|
| O 16 -- O 17 | -0.13 | 2.47043 |
| H 7 -- O 1   | -0.00 | 2.48074 |
| H 17 -- O 15 | -0.02 | 2.49018 |
| H 6 -- O 8   | 0.02  | 2.49845 |
| H 8 -- O 9   | -0.02 | 2.50290 |
| H 4 -- O 5   | -0.02 | 2.50417 |
| H 13 -- O 11 | -0.02 | 2.50508 |
| H 1 -- H 11  | -0.01 | 2.50971 |
| H 1 -- C 1   | -0.05 | 2.51411 |
| H 15 -- O 14 | -0.02 | 2.51941 |
| H 6 -- H 7   | -0.02 | 2.52149 |
| O 10 -- Ce 1 | 0.16  | 2.53038 |
| O 4 -- Ce 2  | 0.11  | 2.53316 |
| H 1 -- O 5   | -0.00 | 2.54061 |
| H 7 -- O 6   | -0.02 | 2.54480 |
| O 2 -- O 12  | -0.13 | 2.54964 |
| O 15 -- O 17 | -0.13 | 2.55234 |
| H 11 -- C 2  | -0.04 | 2.55382 |
| O 17 -- O 18 | -0.10 | 2.56651 |
| O 18 -- Ce 2 | 0.09  | 2.59359 |
| H 11 -- O 5  | -0.02 | 2.59633 |
| O 15 -- O 18 | -0.11 | 2.59839 |
| H 10 -- O 15 | -0.01 | 2.62820 |
| O 15 -- O 16 | -0.09 | 2.66109 |
| C 5 -- Ce 1  | -0.45 | 2.67443 |

|              |       |         |
|--------------|-------|---------|
| H 6 -- C 6   | -0.03 | 2.68952 |
| H 16 -- C 10 | -0.06 | 2.69084 |
| O 6 -- O 9   | -0.02 | 2.69244 |
| O 7 -- O 10  | -0.03 | 2.69562 |
| H 9 -- C 5   | -0.02 | 2.69585 |
| C 4 -- S 1   | -0.16 | 2.69690 |
| H 12 -- O 2  | -0.01 | 2.70938 |
| H 3 -- H 11  | -0.00 | 2.71122 |
| C 12 -- S 3  | -0.15 | 2.72669 |
| H 2 -- H 4   | 0.00  | 2.73475 |
| C 2 -- C 3   | -0.15 | 2.73661 |
| C 8 -- S 2   | -0.16 | 2.73885 |
| O 10 -- Ce 2 | 0.05  | 2.75062 |
| O 9 -- O 13  | -0.03 | 2.75339 |
| H 16 -- O 13 | -0.02 | 2.75559 |
| C 6 -- C 7   | -0.16 | 2.75580 |
| H 2 -- H 7   | -0.02 | 2.76701 |
| H 13 -- H 16 | -0.01 | 2.77515 |
| H 9 -- C 6   | -0.05 | 2.77680 |
| H 5 -- C 1   | -0.01 | 2.78200 |
| C 9 -- S 3   | -0.14 | 2.78239 |
| H 12 -- C 2  | -0.04 | 2.78490 |
| H 1 -- O 3   | -0.01 | 2.78902 |
| C 5 -- S 2   | -0.15 | 2.79248 |
| H 14 -- O 11 | -0.01 | 2.79499 |

|              |       |         |
|--------------|-------|---------|
| H 3 -- O 2   | -0.01 | 2.79893 |
| H 16 -- C 9  | -0.01 | 2.80120 |
| C 4 -- Ce 2  | -0.40 | 2.80616 |
| H 6 -- S 2   | -0.02 | 2.81497 |
| O 1 -- O 2   | -0.05 | 2.81944 |
| H 9 -- O 9   | -0.01 | 2.82835 |
| C 10 -- C 11 | -0.13 | 2.83293 |
| H 8 -- S 3   | -0.02 | 2.83522 |
| O 10 -- O 13 | -0.02 | 2.83730 |
| C 1 -- S 1   | -0.12 | 2.84356 |
| H 5 -- O 5   | -0.00 | 2.85454 |
| H 9 -- O 8   | -0.01 | 2.85560 |
| S 3 -- Ce 1  | 0.23  | 2.87397 |
| O 5 -- O 16  | -0.01 | 2.88373 |
| O 2 -- O 5   | -0.01 | 2.88565 |
| H 12 -- H 16 | -0.01 | 2.88703 |
| C 9 -- O 7   | -0.02 | 2.89060 |
| H 11 -- S 1  | -0.01 | 2.89093 |
| H 3 -- H 12  | -0.01 | 2.89398 |
| H 4 -- C 2   | -0.03 | 2.89448 |
| C 9 -- Ce 2  | -0.31 | 2.89512 |
| O 4 -- S 1   | -0.02 | 2.90576 |
| O 4 -- O 11  | -0.01 | 2.91458 |
| C 9 -- O 4   | -0.02 | 2.91723 |
| O 5 -- O 12  | -0.01 | 2.92271 |

|              |       |         |
|--------------|-------|---------|
| H 15 -- O 11 | -0.00 | 2.92538 |
| H 5 -- O 2   | -0.00 | 2.92700 |
| C 7 -- O 7   | -0.07 | 2.92984 |
| H 6 -- O 3   | 0.00  | 2.93614 |
| H 14 -- O 10 | -0.00 | 2.93623 |
| O 12 -- O 14 | -0.01 | 2.94240 |
| H 4 -- H 6   | -0.00 | 2.94595 |
| H 5 -- C 2   | -0.02 | 2.94976 |
| O 13 -- S 3  | -0.03 | 2.95038 |
| H 5 -- O 4   | -0.00 | 2.96052 |
| C 10 -- O 7  | -0.04 | 2.96132 |
| H 16 -- O 14 | -0.00 | 2.96405 |
| H 5 -- H 12  | -0.01 | 2.96850 |
| O 12 -- S 1  | -0.15 | 2.96988 |
| H 16 -- O 10 | -0.00 | 2.97414 |
| H 11 -- Ce 2 | -0.13 | 2.97713 |
| O 4 -- O 10  | -0.02 | 2.97849 |
| O 14 -- O 16 | -0.01 | 2.98939 |
| O 8 -- S 2   | -0.04 | 2.99076 |

---

#### Hirshfeld Analysis

-----

| Species | Ion | Hirshfeld Charge (e) |
|---------|-----|----------------------|
|---------|-----|----------------------|

---

---

|   |    |       |
|---|----|-------|
| H | 1  | 0.10  |
| H | 2  | 0.06  |
| H | 3  | 0.07  |
| H | 4  | 0.05  |
| H | 5  | 0.07  |
| H | 6  | 0.12  |
| H | 7  | 0.06  |
| H | 8  | 0.04  |
| H | 9  | 0.04  |
| H | 10 | 0.20  |
| H | 11 | 0.09  |
| H | 12 | 0.08  |
| H | 13 | 0.07  |
| H | 14 | 0.07  |
| H | 15 | 0.06  |
| H | 16 | 0.06  |
| H | 17 | 0.18  |
| C | 1  | 0.17  |
| C | 2  | -0.09 |
| C | 3  | -0.09 |
| C | 4  | 0.18  |
| C | 5  | 0.11  |
| C | 6  | -0.09 |
| C | 7  | -0.10 |

|   |    |       |
|---|----|-------|
| C | 8  | 0.18  |
| C | 9  | 0.19  |
| C | 10 | -0.08 |
| C | 11 | -0.08 |
| C | 12 | 0.21  |
| O | 1  | -0.28 |
| O | 2  | -0.13 |
| O | 3  | -0.24 |
| O | 4  | -0.22 |
| O | 5  | -0.18 |
| O | 6  | -0.22 |
| O | 7  | -0.22 |
| O | 8  | -0.23 |
| O | 9  | -0.23 |
| O | 10 | -0.18 |
| O | 11 | -0.20 |
| O | 12 | -0.29 |
| O | 13 | -0.21 |
| O | 14 | -0.19 |
| O | 15 | -0.36 |
| O | 16 | -0.28 |
| O | 17 | -0.23 |
| O | 18 | -0.19 |
| P | 1  | 0.43  |
| S | 1  | 0.11  |



|    |   |      |
|----|---|------|
| S  | 2 | 0.15 |
| S  | 3 | 0.16 |
| Ce | 1 | 0.68 |
| Ce | 2 | 0.54 |

---

---
